# Supplementary material for: Metal–peptide rings form highly entangled topologically inequivalent frameworks with the same ring- and crossing-numbers
Source: PubMed Central journal article supplement (PMC6384881; doi:10.1038/s41467-019-08879-7), 2019-02-22
Supplement: 41467_2019_8879_MOESM1_ESM.pdf [file 41467_2019_8879_MOESM1_ESM.pdf]

## Supplementary Information

**Metal–peptide rings form highly entangled topologically inequivalent frameworks with the same ring- and crossing-numbers**

Sawada et al.

## Supplementary Methods

Synthesis of ligands **3**, **5**, **7** and **9** was carried out according to the following procedure:

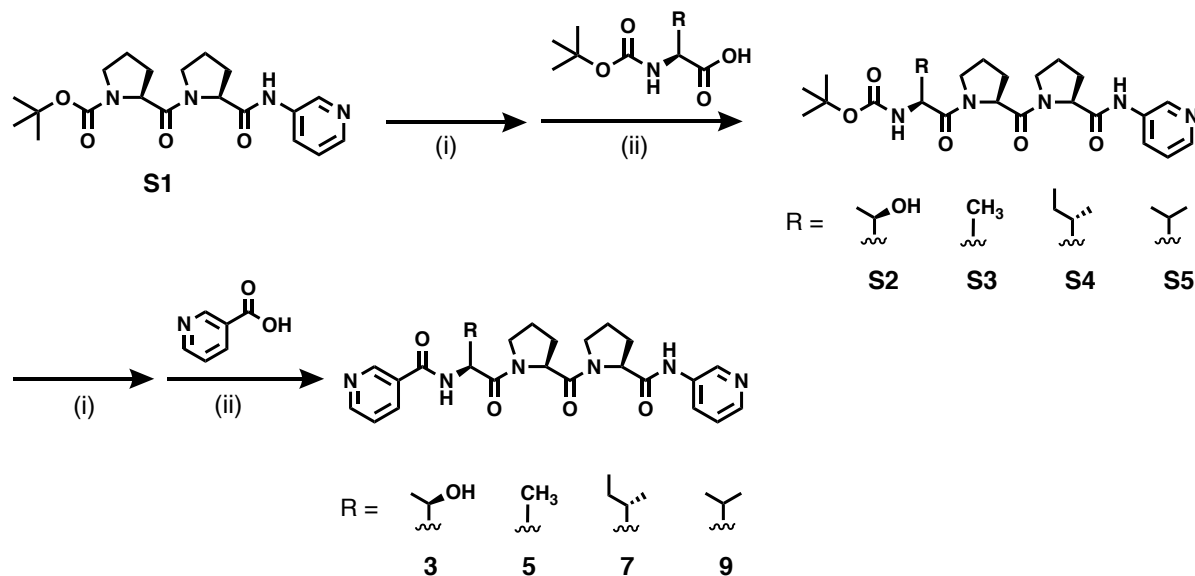

(i) HCl in MeOH / 1,4-dioxane, r.t., 1–1.5 h, (ii) HOBt·H<sub>2</sub>O, EDCI·HCl, DIEA in CHCl<sub>3</sub>, r.t., 1–2 d.

### N-(3-Pyridyl)-boc-prolylprolineamide (S1)

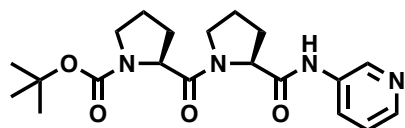

Compound **S1** was prepared according to the previous report.<sup>1</sup>

### N-(3-Pyridyl)-boc-threonylprolylprolineamide (S2)

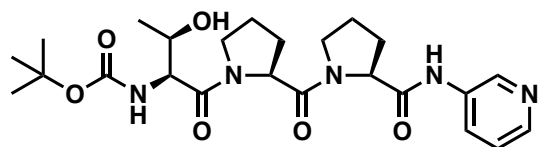

**S1** 2.9 g (7.5 mmol) was dissolved in methanol (20 mL). To the solution, 4N HCl (in 1,4-dioxane) 9.3 mL (37 mmol) was slowly added. After the mixture was stirred for 1 h, the solvents were removed by evaporation. The resulting pale yellow solid was dried *in vacuo*. Quantitative removal of the boc group was confirmed by <sup>1</sup>H NMR measurement.

The obtained *N*-(3-pyridyl)-prolylprolineamide dihydrochloride 2.7 g (7.5 mmol), Boc-L-Thr-OH 1.8 g (8.2 mmol), EDCI•HCl 1.7 g (9.0 mmol), HOBt•H<sub>2</sub>O 1.4 g (9.0 mmol) and DIEA 4.5 mL (7.5 mmol) were dissolved in CH<sub>2</sub>Cl<sub>2</sub> (50 mL). After the mixture was stirred overnight at ambient temperature, the solution was washed with sat. NaHCO<sub>3</sub> aq. (20 mL, twice) and brine (20 mL, once), and then the organic layer was dried over MgSO<sub>4</sub>. The crude product solution was concentrated by evaporation, and then applied to SiO<sub>2</sub> column chromatography (CHCl<sub>3</sub> : MeOH = 100 : 0 → 90 : 10). The fractions were collected and concentrated by evaporation and dried *in vacuo*. The white solid 1.6 g of **S2** was obtained (44% yield).

**m.p.:** 117–125 °C; **ESI-MS** (*m/z*): [M+Na]<sup>+</sup> calcd for C<sub>24</sub>H<sub>35</sub>N<sub>5</sub>O<sub>6</sub>Na: 512.3, found: 512.3; **analysis:** (% calcd, % found for C<sub>24</sub>H<sub>35</sub>N<sub>5</sub>O<sub>6</sub>•H<sub>2</sub>O): C (56.79, 56.83), H (7.35, 7.30), N (13.80, 13.74); **<sup>1</sup>H-NMR** (500 MHz, CDCl<sub>3</sub>, 300 K): δ 9.50 (s, 1H, NH-Py), 8.54 (s, 1H, PyH<sub>2</sub>), 8.31 (d, *J* = 4.0 Hz, 1H, PyH<sub>6</sub>), 8.06 (d, *J* = 8.0 Hz, 1H, PyH<sub>4</sub>), 7.23 (dd, *J* = 8.0 Hz, 5.0 Hz, 1H, PyH<sub>5</sub>), 5.45 (d, *J* = 9.0 Hz, 1H, ThrNH), 4.80 (dd, *J* = 8.0 Hz, 1.5 Hz, 1H, ProH<sub>α</sub>), 4.69 (dd, *J* = 8 Hz, 6 Hz, 1H, ProH<sub>α</sub>), 4.45 (d, *J* = 8.0 Hz, 1H, ThrH<sub>α</sub>), 4.26 (m, 1H, ThrH<sub>β</sub>), 3.88–3.75, 3.63, 3.58 (m, 2H, ProH<sub>δ</sub>), 2.72–1.81 (m, 8H, ProH<sub>β</sub>, ProH<sub>γ</sub>), 1.44 (s, 9H, *t*-Bu), 1.24 (d, *J* = 6.0 Hz, 3H, ThrH<sub>γ</sub>), *conformer*: 9.64 (s, NH-Py), 9.06 (s, PyH<sub>2</sub>), 8.37 (d, PyH<sub>6</sub>), 8.15 (d, PyH<sub>4</sub>), 4.48 (m, ProH<sub>α</sub>), 4.28 (m, ThrH<sub>β</sub>), 3.50, 3.58 (brs, ProH<sub>δ</sub>), 1.41 (s, *t*-Bu), 1.26 (d, ThrH<sub>γ</sub>); **<sup>13</sup>C-NMR** (125 MHz, CDCl<sub>3</sub>, 300 K): δ 173.3, 171.2, (CO), 169.4 (ProCO), 156.1 (BocCO), 145.1 (PyC<sub>6</sub>), 141.3 (PyC<sub>2</sub>), 126.8 (PyC<sub>4</sub>), 123.6 (PyC<sub>5</sub>), 79.9 (BocC<sub>q</sub>), 67.3 (ThrC<sub>β</sub>), 60.8 (ProC<sub>α</sub>), 58.3 (ProC<sub>α</sub>), 56.1 (ThrC<sub>α</sub>), 47.6 (ProC<sub>δ</sub>), 28.7, 28.3 (ProC<sub>β</sub>), 28.3 (BocCH<sub>3</sub>), 26.2, 25.3 (ProC<sub>γ</sub>), 18.5 (ThrC<sub>γ</sub>), *conformer*: 170.6, 169.5, 145.5, 142.5, 127.6, 123.2, 80.0, 67.1, 61.7, 59.7, 56.4, 47.0, 47.1, 32.0, 29.7, 28.2, 25.6, 22.1, 18.6.

#### *N*-(3-Pyridyl)-boc-alanylprolylprolineamide (**S3**)

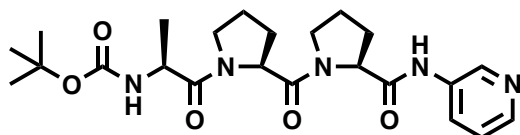

The product was obtained as a white solid 1.7 g (91% yield) following the same procedure for **S2**.

**m.p.:** 89.0–93.1 °C; **HR-MS** ( $m/z$ ):  $[M+H]^+$  calcd for  $C_{23}H_{34}N_5O_5$ : 460.2554, found: 460.2596;  **$^1H$ -NMR** (500 MHz,  $CDCl_3$ , 300 K):  $\delta$  9.96 (s, 1H,  $NH$ -Py), 8.46 (s, 1H,  $PyH_2$ ), 8.16 (s, 1H,  $PyH_6$ ), 7.95 (d,  $J = 8.5$  Hz, 1H,  $PyH_4$ ), 7.04 (dd,  $J = 8.0$  Hz, 5.0 Hz, 1H,  $PyH_5$ ), 5.40 (d,  $J = 8.5$  Hz, 1H,  $AlaNH$ ), 4.74–4.70 (m, 2H,  $ProH_\alpha$ ), 4.49 (m, 1H,  $AlaH_\alpha$ ), 3.84 (m, 1H,  $ProH_\delta$ ), 3.76 (m, 1H,  $ProH_\delta$ ), 3.64 (m, 2H,  $ProH_\delta$ ), 2.18, 2.03 (m, 4H,  $ProH_\gamma$ ), 2.27, 2.18, 2.07 (m, 4H,  $ProH_\beta$ ), 1.43 (s, 9H,  $t$ -Bu), 1.30 (d,  $J = 7$  Hz, 3H,  $AlaH_\beta$ ), *conformer*: 9.84 (s,  $NH$ -Py), 9.08 (s,  $PyH_2$ ), 8.35 (s,  $PyH_6$ ), 8.23 (d,  $PyH_4$ ), 7.23 (dd,  $PyH_5$ ), 5.37 (d,  $AlaNH$ ), 4.44 (m,  $AlaH_\alpha$ ), 2.67 (s,  $ProH_\beta$ );  **$^{13}C$ -NMR** (125 MHz,  $CDCl_3$ , 300 K):  $\delta$  171.6 ( $AlaCO$ ), 171.5 ( $ProCO$ ), 170.5 ( $ProCO$ ), 155.1 ( $BocCO$ ), 144.4 ( $PyC_6$ ), 140.8 ( $PyC_2$ ), 135.3 ( $PyC_3$ ), 126.2 ( $PyC_4$ ), 123.3 ( $PyC_5$ ), 79.6 ( $BocC_q$ ), 60.8 ( $ProC_\alpha$ ), 58.0 ( $ProC_\alpha$ ), 47.7 ( $AlaC_\alpha$ ), 47.5 ( $ProC_\delta$ ), 47.2 ( $ProC_\delta$ ), 28.3 ( $BocCH_3$ ), 28.4, 28.1 ( $ProC_\beta$ ), 25.1, 25.0 ( $ProC_\gamma$ ), 18.3 ( $AlaC_\beta$ ), *conformer*: 172.0, 170.8, 169.8, 155.3, 145.2, 142.5, 134.9, 127.5, 123.2, 79.8, 61.7, 59.1, 47.7, 47.4, 46.8, 31.8, 28.3, 28.2, 25.4, 22.2, 17.6.

***N*-(3-Pyridyl)-*boc*-isoleucylprolylprolineamide (S4)**

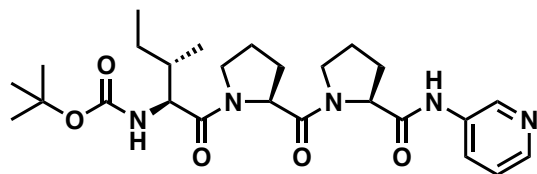

The product was obtained as a white solid 0.42 g (84% yield) following the same procedure for **S2**.

**m.p.:** 181–182 °C; **HRMS** ( $m/z$ ):  $[M+H]^+$  calcd for  $C_{26}H_{40}N_5O_5$ , 502.3024; found, 502.3028;  **$^1H$ -NMR** (500 MHz,  $CDCl_3$ , 300 K):  $\delta$  10.07 (s, 1H,  $NH$ -Py), 8.46 (s, 1H,  $PyH_2$ ), 8.15 (d,  $J = 4.5$  Hz, 1H,  $PyH_6$ ), 7.93 (d,  $J = 8.5$  Hz, 1H,  $PyH_4$ ), 7.02 (dd,  $J = 8.5$  Hz, 5.0 Hz, 1H,  $PyH_5$ ), 5.29 (d,  $J = 9.5$  Hz, 1H,  $IleNH$ ), 4.78 (dd,  $J = 8.0$  Hz, 5.0 Hz, 1H,  $Pro(2)H_\alpha$ ), 4.72 (t,  $J = 6.0$  Hz, 1H,  $Pro(3)H_\alpha$ ), 4.30 (t,  $J = 9.0$  Hz, 1H,  $IleH_\alpha$ ), 3.89 (m, 2H,  $ProH_\delta$ ), 3.71 (m, 2H,  $ProH_\delta$ ), 2.29, 2.18, 2.11, 2.04 (m, 8H,  $ProH_\beta$ ,  $ProH_\gamma$ ), 1.75 (m, 1H,  $IleH_\beta$ ), 1.60, 1.17 (m, 2H,  $IleH_\gamma$ ), 1.43 (s, 9H,  $t$ -Bu), 0.98 (d,  $J = 7.0$  Hz, 3H,  $IleH_\gamma$ ), 0.85 (t,  $J = 7.5$  Hz, 3H,  $IleH_\delta$ ), *conformer*: 10.05 (s,  $NH$ -Py), 9.08 (s,  $PyH_2$ ), 8.34 (d,  $PyH_4$ ), 8.30 (d,  $PyH_6$ ), 7.25 (dd,  $PyH_5$ ), 5.42 (d,  $IleNH$ ), 4.49 (d,  $Pro(2)H_\alpha$ ), 4.41 (t,  $Pro(3)H_\alpha$ ), 4.23 (t,  $IleH_\alpha$ ), 4.00, 3.64 (m,  $ProH_\delta$ ), 1.08 (d,  $IleH_\gamma$ ), 0.93 (t,  $IleH_\delta$ );  **$^{13}C$ -NMR** (125 MHz,  $CDCl_3$ , 300 K):  $\delta$  171.4 (CO), 171.3 (CO), 170.6 ( $Pro(3)CO$ ), 155.5 ( $BocCO$ ), 144.1 ( $PyC_6$ ), 140.6 ( $PyC_2$ ), 135.4 ( $PyC_3$ ), 126.1 ( $PyC_4$ ), 123.1



(PyC<sub>5</sub>), 79.4 (BocC<sub>q</sub>), 60.7 (ProC<sub>α</sub>), 58.2 (ProC<sub>α</sub>), 56.0 (IleC<sub>α</sub>), 47.7, 47.5 (ProC<sub>δ</sub>), 37.9 (IleC<sub>β</sub>), 28.4, 28.2, 28.1 (ProC<sub>β</sub>, BocCH<sub>3</sub>), 25.0, 24.9 (ProC<sub>γ</sub>), 24.4 (IleC<sub>γ</sub>), 15.1 (IleC<sub>γ'</sub>), 10.9 (IleC<sub>δ</sub>), *conformer*: 171.7, 170.6, 170.0, 155.7, 144.9, 142.3, 135.0, 127.4, 79.4, 61.7, 59.2, 56.2, 46.8, 37.3, 31.8, 25.4, 22.2, 18.3, 15.0, 10.8.

### N-(3-Pyridyl)-boc-valylprolylprolineamide (S5)

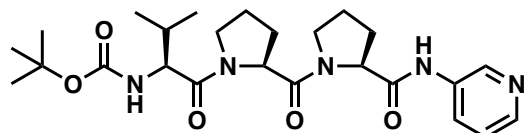

The product was obtained as a white solid 0.70 g (72% yield) following the same procedure for S2.

**m.p.:** 119–120 °C; **ESI-MS** ( $m/z$ ):  $[M+Na]^+$  calcd for C<sub>25</sub>H<sub>37</sub>N<sub>5</sub>O<sub>5</sub>Na, 510.3; found, 510.3; **analysis** (% calcd, % found for C<sub>25</sub>H<sub>37</sub>N<sub>5</sub>O<sub>5</sub>•(H<sub>2</sub>O)<sub>0.5</sub>): C (60.47, 60.28), H (7.71, 7.83), N (14.10, 13.99); **<sup>1</sup>H-NMR** (500 MHz, DMSO-*d*<sub>6</sub>, 300 K): δ 10.25 (s, 1H, NH-Py), 8.71 (d,  $J = 2.5$  Hz, 1H, PyH<sub>2</sub>), 8.25 (dd,  $J = 4.5$  Hz, 1.5 Hz, 1H, PyH<sub>6</sub>), 8.02 (m, 1H, PyH<sub>4</sub>), 7.33 (dd,  $J = 8.5$  Hz, 5.0 Hz, 1H, PyH<sub>5</sub>), 6.73 (d,  $J = 8.5$  Hz, 1H, IleNH), 4.62 (dd,  $J = 9.0$  Hz, 5.0 Hz, 1H, Pro(2)H<sub>α</sub>), 4.44 (dd,  $J = 8.0$  Hz, 4.0 Hz, 1H, Pro(3)H<sub>α</sub>), 3.99 (t,  $J = 8.0$  Hz, 1H, ValH<sub>α</sub>), 3.73, 3.61, 3.51 (m, 4H, ProH<sub>δ</sub>), 2.18 (m, 2H, ProH<sub>β</sub>), 2.25–1.77 (m, 7H, ProH<sub>β</sub>, ProH<sub>γ</sub>, ValH<sub>β</sub>), 1.37 (s, 9H, *t*-Bu), 0.89, 0.84 (d,  $J = 7.0$  Hz, 6H, ValH<sub>γ</sub>), (*an additional conformer exists*); **<sup>13</sup>C-NMR** (500 MHz, DMSO-*d*<sub>6</sub>, 300 K): δ 171.6 (Pro(3)CO), 170.4, 170.4 (Pro(2)CO, ValCO), 156.0 (BocCO), 144.6 (PyC<sub>6</sub>), 141.0 (PyC<sub>2</sub>), 136.2 (PyC<sub>3</sub>), 126.3 (PyC<sub>4</sub>), 124.1 (PyC<sub>5</sub>), 78.4 (BocC<sub>q</sub>), 60.4 (Pro(3)C<sub>α</sub>), 58.0 (Pro(2)C<sub>α</sub>), 57.6 (ValC<sub>α</sub>), 47.5, 47.2 (ProC<sub>δ</sub>), 30.4 (ValC<sub>β</sub>), 29.7 (ProC<sub>γ</sub>), 28.7 (BocCH<sub>3</sub>), 28.4 (ProC<sub>β</sub>), 25.1, 25.0 (ProC<sub>γ</sub>), 19.5, 18.9 (ValC<sub>γ</sub>), (*an additional conformer exists*).

### Tripeptide ligand (3)

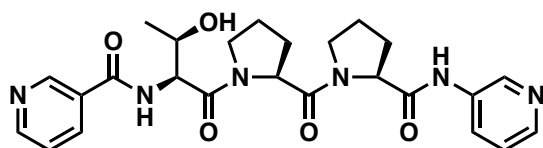

1.6 g (3.3 mmol) of S2 was dissolved in methanol (20 mL). To the solution, 4N HCl (in 1,4-dioxane) 4.0 mL (16 mmol) was slowly added. After the mixture was stirred for 1 h, the

solvents were removed by evaporation. The resulting white solid was dried *in vacuo*. Quantitative removal of the boc group was confirmed by  $^1\text{H}$  NMR measurement.

The obtained *N*-(3-pyridyl)-threonylprolylprolineamide dihydrochloride 1.5 g (3.3 mmol), nicotinic acid 0.44 g (3.6 mmol), EDCI·HCl 0.76 g (3.9 mmol), HOBt·H<sub>2</sub>O 0.60 g (3.9 mmol) and DIEA 2.0 mL (11 mmol) were dissolved in CHCl<sub>3</sub> (50 mL). After the mixture was stirred for 2 days at ambient temperature, the solution was concentrated by evaporation, and then applied to SiO<sub>2</sub> column chromatography (EtOAc : MeOH = 9 : 1 → 1 : 1). The fractions were concentrated by evaporation. The material was further purified by using a preparative SEC (W252 column, eluent: MeOH : H<sub>2</sub>O = 95 : 5 (v/v)). The resulting white solid was dissolved in *ca.* 30 mL of H<sub>2</sub>O, and then freeze-dried. White powder 0.68 g of **3** was obtained (45% yield).

**m.p.:** 127–130 °C; **HRMS** ( $m/z$ ):  $[\text{M}+\text{H}]^+$  calcd for C<sub>25</sub>H<sub>31</sub>N<sub>6</sub>O<sub>5</sub>, 495.2350; found, 495.2377; **analysis:** (% calcd, % found for C<sub>25</sub>H<sub>30</sub>N<sub>6</sub>O<sub>5</sub>·(H<sub>2</sub>O)<sub>1.5</sub>): C (57.57, 57.61), H (6.38, 6.33), N (16.11, 16.24);  **$^1\text{H}$ -NMR** (500 MHz, CDCl<sub>3</sub>, 300 K):  $\delta$  9.54 (s, 1H, NH-Py), 9.08 (d,  $J$  = 2.0 Hz, 1H, PyH<sub>2N</sub>), 8.73 (dd,  $J$  = 5.0 Hz, 2.0 Hz, 1H, PyH<sub>6N</sub>), 8.54 (d,  $J$  = 2.0 Hz, 1H, PyH<sub>2C</sub>), 8.31 (dd,  $J$  = 5.0 Hz, 1.5 Hz, 1H, PyH<sub>6C</sub>), 8.12 (ddd, 1H,  $J$  = 8.0 Hz, 2.0 Hz, 2.0 Hz, PyH<sub>4N</sub>), 8.08 (ddd,  $J$  = 8.0 Hz, 2.5 Hz, 1.5 Hz, 1H, PyH<sub>4C</sub>), 7.37 (ddd,  $J$  = 8.0 Hz, 5.0 Hz, 1.0 Hz, 2H, PyH<sub>5N</sub>), 7.33 (d,  $J$  = 8.5 Hz, 1H, ThrNH), 7.22 (dd,  $J$  = 8.5 Hz, 4.5 Hz, 1H, PyH<sub>5C</sub>), 5.01 (dd,  $J$  = 8.5 Hz, 2.0 Hz, 1H, ThrNH <sub>$\alpha$</sub> ), 4.79 (dd,  $J$  = 8.0 Hz, 2.0 Hz, 2H, ProH <sub>$\alpha$</sub> ), 4.74 (dd,  $J$  = 8.0 Hz, 6.5 Hz, 2H, ProH <sub>$\alpha$</sub> ), 4.43 (m, 1H, ThrH <sub>$\beta$</sub> ), 4.00–3.58 (m, 5H, ProH <sub>$\delta$</sub> , OH), 2.75–1.88 (m, 8H, ProH <sub>$\beta$</sub> , ProH <sub>$\gamma$</sub> ), 1.30 (d,  $J$  = 6.5 Hz, 3H, ThrH <sub>$\gamma$</sub> ), (*additional two sets of conformers exist*);  **$^{13}\text{C}$ -NMR** (125 MHz, CDCl<sub>3</sub>, 300 K):  $\delta$  172.8 (ProCO), 169.9 (ThrCO), 169.5 (ProCO), 165.8 (PyCO), 152.6 (PyC<sub>6N</sub>), 148.5 (PyC<sub>2N</sub>), 145.1 (PyC<sub>6C</sub>), 141.2 (PyC<sub>2C</sub>), 135.0 (PyC<sub>4N</sub>), 135.0 (PyC<sub>3C</sub>), 129.4 (PyC<sub>3N</sub>), 126.8 (PyC<sub>4C</sub>), 123.5 (PyC<sub>5N</sub>, PyC<sub>5C</sub>), 67.0 (ThrC <sub>$\beta$</sub> ), 60.9, 58.6 (ProC <sub>$\alpha$</sub> ), 55.9 (ThrC <sub>$\alpha$</sub> ), 58.6 (ThrC <sub>$\beta$</sub> ), 55.9 (ThrC <sub>$\beta$</sub> ), 47.8, 47.5 (ProC <sub>$\delta$</sub> ), 28.6, 26.7, 25.4, 25.3 (ProC <sub>$\beta$</sub> , ProC <sub>$\gamma$</sub> ), 19.1 (ThrC <sub>$\gamma$</sub> ), (*additional two sets of conformers exist*).

### Tripeptide ligand (5)

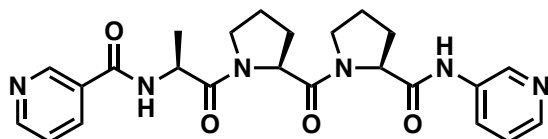

The product was obtained as a white solid 0.74 g (59% yield) following the same procedure for **3** and purified by column chromatography (EtOAc : MeOH = 10 : 1 → 2 : 1). The material was further purified by using a preparative SEC (W252 column, eluent: MeOH : H<sub>2</sub>O = 95 : 5 (v/v)).

**m.p.:** 130–137 °C; **HRMS:** [M+Na]<sup>+</sup> calcd for C<sub>24</sub>H<sub>28</sub>N<sub>6</sub>O<sub>4</sub>Na: 487.2064; found: 487.2024; **analysis:** (% calcd, % found for C<sub>24</sub>H<sub>28</sub>N<sub>6</sub>O<sub>4</sub>•(H<sub>2</sub>O)<sub>0.5</sub>): C (60.88, 60.74), H (6.17, 6.19), N (17.75, 17.99); **<sup>1</sup>H-NMR** (500 MHz, DMSO-*d*<sub>6</sub>, 300 K): δ 10.25 (s, 1H, NH-Py), 9.03 (d, *J* = 1.5 Hz, 1H, PyH<sub>2N</sub>), 8.78 (d, *J* = 7.0 Hz, 1H, AlaNH), 8.73 (d, *J* = 2.0 Hz, 1H, PyH<sub>2C</sub>), 8.71 (dd, *J* = 5.0 Hz, 2.0 Hz, 1H, PyH<sub>6N</sub>), 8.26 (dd, *J* = 4.5 Hz, 1.5 Hz, 1H, PyH<sub>6C</sub>), 8.22 (ddd, *J* = 8.0 Hz, 2.0 Hz, 1.5 Hz, 1H, PyH<sub>4N</sub>), 8.03 (ddd, *J* = 8.5 Hz, 2.5 Hz, 1.5 Hz, 1H, PyH<sub>4C</sub>), 7.51 (dd, *J* = 8.0 Hz, 5.0 Hz, 1H, PyH<sub>5N</sub>), 7.34 (dd, *J* = 8.5 Hz, 4.5 Hz, 1H, PyH<sub>5C</sub>), 4.72 (m, 1H, AlaH<sub>α</sub>), 4.64 (dd, *J* = 8.5 Hz, 4.5 Hz, 1H, Pro(2)H<sub>α</sub>), 4.44 (dd, *J* = 8.5 Hz, 4.5 Hz, 1H, Pro(3)H<sub>α</sub>), 3.76, 3.54 (m, 2H, Pro(2)H<sub>δ</sub>), 3.72, 3.50 (m, 2H, Pro(3)H<sub>δ</sub>), 2.19, 1.85 (m, 2H, Pro(2)H<sub>β</sub>), 2.15, 1.91 (m, 2H, Pro(3)H<sub>β</sub>), 1.94, 1.93 (m, 2H, Pro(2)H<sub>γ</sub>), 2.01, 1.92 (m, 2H, Pro(3)H<sub>γ</sub>), 1.31 (d, *J* = 7.5 Hz, 3H, AlaH<sub>β</sub>), (*additional two sets of conformers exist*); **<sup>13</sup>C-NMR** (125 MHz, DMSO-*d*<sub>6</sub>, 300 K): δ 171.6 (Pro(3)CO), 170.6 (AlaCO), 170.4 (Pro(2)CO), 165.0 (PyCO), 152.4 (PyC<sub>6N</sub>), 149.0 (PyC<sub>2N</sub>), 144.6 (PyC<sub>6C</sub>), 141.1 (PyC<sub>2C</sub>), 136.1 (PyC<sub>3C</sub>), 135.6 (PyC<sub>4N</sub>), 129.8 (PyC<sub>3N</sub>), 126.4 (PyC<sub>4C</sub>), 124.1 (PyC<sub>5C</sub>), 123.8 (PyC<sub>5N</sub>), 60.5 (Pro(3)C<sub>α</sub>), 58.0 (Pro(2)C<sub>α</sub>), 47.5 (AlaC<sub>α</sub>), 47.1 (Pro(2)C<sub>δ</sub>), Pro(3)C<sub>δ</sub>, 29.7 (Pro(3)C<sub>β</sub>), 28.3 (Pro(2)C<sub>β</sub>), 25.2 (Pro(3)C<sub>γ</sub>), 25.0 (Pro(2)C<sub>γ</sub>), 16.8 (AlaC<sub>α</sub>), (*additional two sets of conformers exist*).

#### Tripeptide ligand (7)

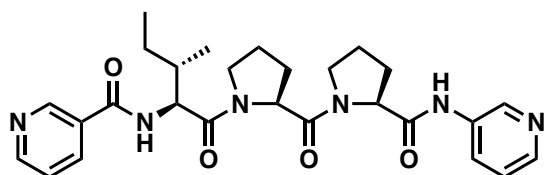

The product was obtained as a white solid 0.14 g (32% yield) following the same procedure for **3** and purified by column chromatography (EtOAc : MeOH = 10 : 1 → 2 : 1). The material was further purified by using a preparative SEC (W252 column, eluent: MeOH).

**m.p.:** 122–131 °C; **HRMS:**  $[M+H]^+$  calcd for  $C_{27}H_{35}N_6O_4$ : 507.2705, found: 507.2714;  **$^1H$ -NMR** (500 MHz, DMSO- $d_6$ , 300 K):  $\delta$  10.26 (s, 1H, NH-Py), 9.03 (dd,  $J = 2.0$  Hz, 1.0 Hz, 1H, Py $H_{2N}$ ), 8.80 (d,  $J = 8.0$  Hz, 1H, IleNH), 8.73 (d,  $J = 2.0$  Hz, 1H, Py $H_{2C}$ ), 8.70 (dd,  $J = 5.0$  Hz, 2.0 Hz, 1H, Py $H_{6N}$ ), 8.26 (dd,  $J = 5.0$  Hz, 1.5 Hz, 1H, Py $H_{6C}$ ), 8.23 (ddd,  $J = 8.0$  Hz, 2.0 Hz, 2.0 Hz, 1H, Py $H_{4N}$ ), 8.03 (ddd,  $J = 8.5$  Hz, 2.5 Hz, 1.5 Hz, 1H, Py $H_{4C}$ ), 7.49 (ddd,  $J = 8.0$  Hz, 5.0 Hz, 1.0 Hz, 1H, Py $H_{5N}$ ), 7.34 (dd,  $J = 8.5$  Hz, 4.5 Hz, 1H, Py $H_{5C}$ ), 4.65 (dd,  $J = 8.5$  Hz, 4.5 Hz, 1H, Pro(2) $H_a$ ), 4.53 (dd,  $J = 10$  Hz, 8.0 Hz, 1H, Ile $H_a$ ), 4.47 (dd,  $J = 8.0$  Hz, 4.0 Hz, 1H, Pro(3) $H_a$ ), 3.99, 3.73, 3.61 (m, 4H, Pro $H_\delta$ ), 2.19, 2.06–1.82 (m, 9H, Pro $H_\beta$ , Pro $H_\gamma$ , Ile $H_\beta$ ), 1.59 (ddd,  $J = 13$  Hz, 8.0 Hz, 3.0 Hz, 1H, Ile $H_\gamma$ ), 1.19 (m, 1H, Ile $H_\gamma$ ), 0.96 (d,  $J = 7.0$  Hz, 3H, Ile $H_\gamma$ ), 0.84, (t,  $J = 7.5$  Hz, 3H, Ile $H_\delta$ ), (*additional two sets of conformers exist*);  **$^{13}C$ -NMR** (125 MHz, DMSO- $d_6$ , 300 K):  $\delta$  171.6 (Pro(3)CO), 170.4 (Pro(2)CO), 170.2 (IleCO), 165.3 (IleCO), 152.4 (Py $C_{6N}$ ), 149.2 (Py $C_{2N}$ ), 144.6 (Py $C_{6C}$ ), 141.0 (Py $C_{2C}$ ), 136.2 (Py $C_{3C}$ ), 135.8 (Py $C_{4N}$ ), 129.8 (Py $C_{3N}$ ), 126.3 (Py $C_{4C}$ ), 124.1 (Py $C_{5C}$ ), 123.8 (Py $C_{5N}$ ), 60.4 (Pro(3) $C_a$ ), 58.1 (Pro(2) $C_a$ ), 55.7 (Ile $C_a$ ), 47.7, 47.2 (Pro $C_\delta$ ), 36.1 (Ile $C_\beta$ ), 29.7, 28.5 (Pro $C_\gamma$ ), 25.3 (Ile $C_\gamma$ ), 25.1, 24.9 (Pro $C_\beta$ ), 15.2 (Ile $C_\gamma$ ), 10.9 (Ile $C_\delta$ ), (*additional two sets of conformers exist*).

### Tripeptide ligand (9)

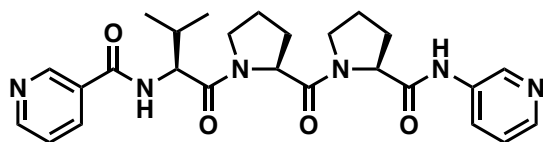

The product was obtained as a white solid 0.19 g (35% yield) following the same procedure for **3** and purified by column chromatography (EtOAc : MeOH = 10 : 1  $\rightarrow$  2 : 1). The material was further purified by using a preparative SEC (W252 column, eluent: MeOH).

**m.p.:** 120.0–129.8 °C; **ESI-MS** ( $m/z$ ):  $[M+Na]^+$  calcd for  $C_{26}H_{32}N_6O_4Na$ : 515.2, found: 515.3; **analysis:** (% calcd, % found for  $C_{26}H_{32}N_6O_4 \cdot (H_2O)_{1.5}$ ), C (60.10, 60.01), H (6.79, 6.68), N (16.17, 16.03);  **$^1H$ -NMR** (500 MHz, DMSO- $d_6$ , 300 K):  $\delta$  10.26 (s, 1H, NH-Py), 9.03 (d,  $J = 1.5$  Hz, 1H, Py $H_{2N}$ ), 8.76 (d,  $J = 8.0$  Hz, 1H, ValNH), 8.73 (d,  $J = 2.0$  Hz, 1H, Py $H_{2C}$ ), 8.71 (dd,  $J = 4.5$  Hz, 1.5 Hz, 1H, Py $H_{6N}$ ), 8.26 (dd,  $J = 5.0$  Hz, 1.5 Hz, 1H, Py $H_{6C}$ ), 8.23 (ddd,  $J = 8.0$  Hz, 2.0 Hz, 2.0 Hz, 1H, Py $H_{4N}$ ), 8.03 (ddd,  $J = 8.0$  Hz, 2.5 Hz, 1.5 Hz, 1H,

PyH<sub>4C</sub>), 7.50 (dd,  $J = 7.0$  Hz, 5.0 Hz, 1H, PyH<sub>5N</sub>), 7.33 (d,  $J = 8.0$  Hz, 5.0 Hz, 1H, PyH<sub>5C</sub>), 4.65 (dd,  $J = 8.5$  Hz, 5.0 Hz, 1H, Pro(2)H <sub>$\alpha$</sub> ), 4.46 (m, 2H, ValH <sub>$\alpha$</sub> , Pro(3)H <sub>$\alpha$</sub> ), 3.97, 3.73, 3.64–3.58 (m, 4H, ProH <sub>$\delta$</sub> ), 2.2–1.8 (m, 8H, ProH <sub>$\beta$</sub> , ProH <sub>$\gamma$</sub> ), 2.12 (m, 1H, ValH <sub>$\beta$</sub> ), 1.00, 0.97 (m, 6H, ValH <sub>$\gamma$</sub> ), (*additional two sets of conformers exist*); <sup>13</sup>C-NMR (125 MHz, DMSO-*d*<sub>6</sub>, 300 K):  $\delta$  171.6 (Pro(3)CO), 170.4 (CO), 170.1 (CO), 165.4 (Py-CO), 152.4 (PyC<sub>6N</sub>), 149.2 (PyC<sub>2N</sub>), 144.6 (PyC<sub>6C</sub>), 141.0 (PyC<sub>2C</sub>), 136.2 (PyC<sub>3C</sub>), 135.8 (PyC<sub>4N</sub>), 129.9 (PyC<sub>3N</sub>), 126.3 (PyC<sub>4C</sub>), 124.1 (PyC<sub>5C</sub>), 123.8 (PyC<sub>5N</sub>), 60.4 (Pro(3)C <sub>$\alpha$</sub> ), 58.1 (Pro(2)C <sub>$\alpha$</sub> ), 57.4 (ValC <sub>$\alpha$</sub> ), 47.7, 47.2 (ProC <sub>$\delta$</sub> ), 30.4 (ValC <sub>$\beta$</sub> ), 29.7, 28.5 (ProC <sub>$\gamma$</sub> ), 25.1, 24.9 (ProC <sub>$\beta$</sub> ), 19.7, 19.3 (ValC <sub>$\gamma$</sub> ), (*additional two sets of conformers exist*).

## Supplementary Table

**Supplementary Table 1** | Crystal data and structural refinement for **4**, **6**, and **8**

|                                                     | <b>4</b>                                                                                                               | <b>6</b>                                                                                                                   | <b>8</b>                                                                                                           |
|-----------------------------------------------------|------------------------------------------------------------------------------------------------------------------------|----------------------------------------------------------------------------------------------------------------------------|--------------------------------------------------------------------------------------------------------------------|
| Identification code                                 | Saito88                                                                                                                | Saito82                                                                                                                    | Saito60                                                                                                            |
| CCDC number                                         | 1869043                                                                                                                | 1869042                                                                                                                    | 1869041                                                                                                            |
| Empirical formula                                   | C <sub>319.03</sub> H <sub>401.81</sub> Ag <sub>12</sub> F <sub>24.09</sub> N <sub>83</sub> O                          | C <sub>288</sub> H <sub>346</sub> Ag <sub>12</sub> F <sub>51</sub> N <sub>72</sub> O <sub>61</sub> P <sub>8.50</sub>       | C <sub>330</sub> H <sub>408</sub> Ag <sub>12</sub> B <sub>9</sub> F <sub>36</sub> N <sub>78</sub> O <sub>92</sub>  |
| Formula weight                                      | 9269.09                                                                                                                | 8319.05                                                                                                                    | 9015.05                                                                                                            |
| Temperature                                         | 108(2) K                                                                                                               | 103(2) K                                                                                                                   | 100(2) K                                                                                                           |
| Wavelength                                          | 0.71073 Å                                                                                                              | 0.71073 Å                                                                                                                  | 0.71073 Å                                                                                                          |
| Crystal system                                      | Orthorhombic                                                                                                           | Trigonal                                                                                                                   | Cubic                                                                                                              |
| Space group                                         | <i>P</i> 2 <sub>1</sub> 2 <sub>1</sub> 2                                                                               | <i>R</i> 3                                                                                                                 | <i>F</i> 23                                                                                                        |
| Unit cell dimensions                                | <i>a</i> = 32.3232(19) Å<br><i>b</i> = 34.694(2) Å<br><i>c</i> = 23.2972(14) Å<br><i>α</i> = <i>β</i> = <i>γ</i> = 90° | <i>a</i> = 23.268(2) Å<br><i>b</i> = 23.268(2) Å<br><i>c</i> = 23.268(2) Å<br><i>α</i> = <i>β</i> = <i>γ</i> = 100.333(2)° | <i>a</i> = 33.843(3) Å<br><i>b</i> = 33.843(3) Å<br><i>c</i> = 33.843(3) Å<br><i>α</i> = <i>β</i> = <i>γ</i> = 90° |
| Volume                                              | 26126(3) Å <sup>3</sup>                                                                                                | 11897 (3) Å <sup>3</sup>                                                                                                   | 38762(5) Å <sup>3</sup>                                                                                            |
| <i>Z</i>                                            | 2                                                                                                                      | 1                                                                                                                          | 4                                                                                                                  |
| Density (calculated)                                | 1.178 Mg•m <sup>-3</sup>                                                                                               | 1.161 Mg•m <sup>-3</sup>                                                                                                   | 1.545 Mg•m <sup>-3</sup>                                                                                           |
| Absorption coefficient                              | 0.551 mm <sup>-1</sup>                                                                                                 | 0.590 mm <sup>-1</sup>                                                                                                     | 0.698 mm <sup>-1</sup>                                                                                             |
| <i>F</i> (000)                                      | 9473                                                                                                                   | 4217                                                                                                                       | 18460                                                                                                              |
| Crystal size                                        | 0.45 × 0.25 × 0.11 mm <sup>3</sup>                                                                                     | 0.20 × 0.12 × 0.11 mm <sup>3</sup>                                                                                         | 0.05 × 0.05 × 0.03 mm <sup>3</sup>                                                                                 |
| Theta range for data                                | 1.59 to 25.79°                                                                                                         | 1.82 to 26.57°                                                                                                             | 1.70 to 19.79°                                                                                                     |
| Index ranges                                        | -39 ≤ <i>h</i> ≤ 39                                                                                                    | -28 ≤ <i>h</i> ≤ 28                                                                                                        | -32 ≤ <i>h</i> ≤ 32                                                                                                |
| Reflections collected                               | 345520                                                                                                                 | 153255                                                                                                                     | 59670                                                                                                              |
| Independent reflections                             | 50066 [ <i>R</i> <sub>int</sub> = 0.0682]                                                                              | 32596 [ <i>R</i> <sub>int</sub> = 0.2364]                                                                                  | 2958 [ <i>R</i> <sub>int</sub> = 0.0957]                                                                           |
| Completeness                                        | 99.7% ( <i>θ</i> = 19.79°)                                                                                             | 98.9% ( <i>θ</i> = 19.79°)                                                                                                 | 99.9% ( <i>θ</i> = 19.79°)                                                                                         |
| Max. and min. transmission                          | 0.9419 and 0.7896                                                                                                      | 0.9380 and 0.8912                                                                                                          | 0.9787 and 0.9666                                                                                                  |
| Refinement method                                   |                                                                                                                        | Full-matrix least-squares on <i>F</i> <sup>2</sup>                                                                         |                                                                                                                    |
| Data / restraints / parameters                      | 50066 / 628 / 2778                                                                                                     | 32596 / 618 / 1403                                                                                                         | 2958 / 20 / 197                                                                                                    |
| Goodness-of-fit on <i>F</i> <sup>2</sup>            | 1.072                                                                                                                  | 0.919                                                                                                                      | 1.340                                                                                                              |
| Final <i>R</i> indices [ <i>I</i> > 2σ( <i>I</i> )] | <i>R</i> <sub>1</sub> = 0.1072, <i>wR</i> <sub>2</sub> = 0.2804                                                        | <i>R</i> <sub>1</sub> = 0.1107, <i>wR</i> <sub>2</sub> = 0.2896                                                            | <i>R</i> <sub>1</sub> = 0.1029, <i>wR</i> <sub>2</sub> = 0.2816                                                    |
| <i>R</i> indices (all data)                         | <i>R</i> <sub>1</sub> = 0.14892, <i>wR</i> <sub>2</sub> = 0.3387                                                       | <i>R</i> <sub>1</sub> = 0.2619, <i>wR</i> <sub>2</sub> = 0.3574                                                            | <i>R</i> <sub>1</sub> = 0.1333, <i>wR</i> <sub>2</sub> = 0.3215                                                    |
| Absolute structure parameter                        | 0.014(6)                                                                                                               | 0.090(14)                                                                                                                  | 0.023(18)                                                                                                          |
| Largest diff. peak and hole                         | 1.982 and -1.251 e.Å <sup>-3</sup>                                                                                     | 1.149 and -0.580 e.Å <sup>-3</sup>                                                                                         | 1.387 and -0.647 e.Å <sup>-3</sup>                                                                                 |

## Supplementary Figures

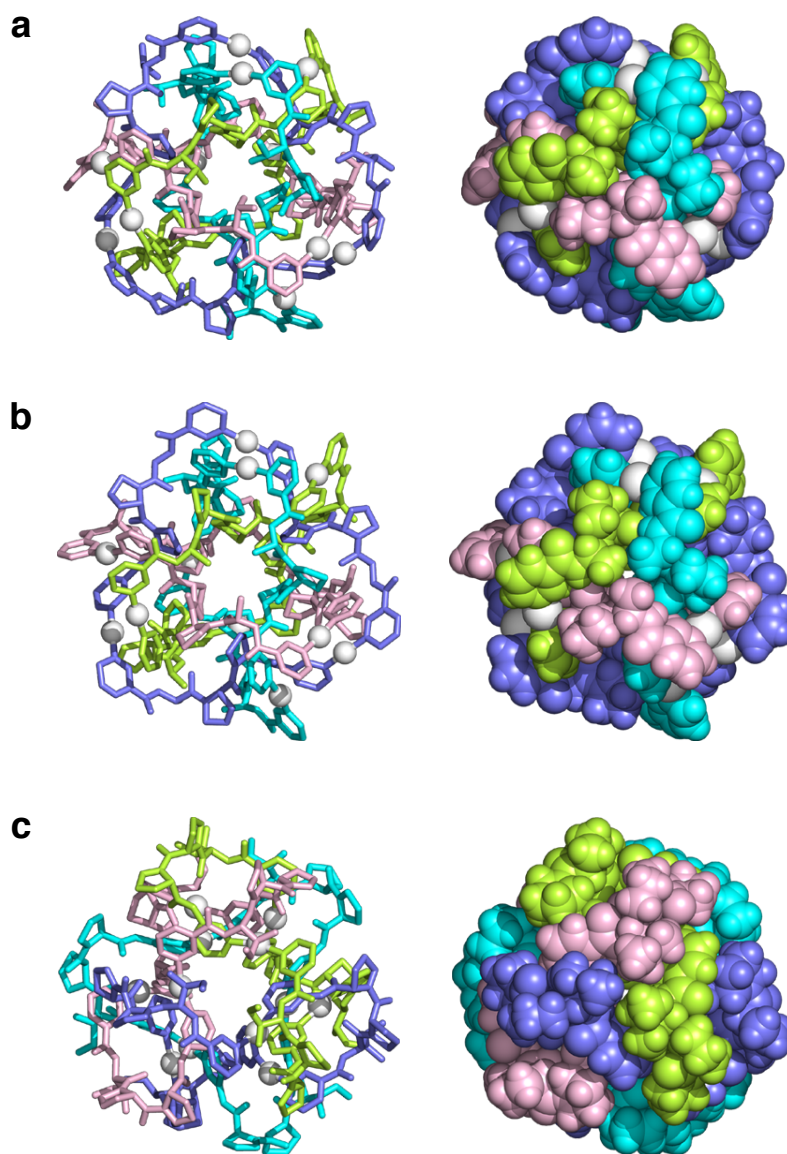

**Supplementary Figure 1 | X-ray structures of [4]<sub>12</sub>-catenanes.** Stick (left) and space-filling (right) representations of [4]<sub>12</sub>-catenanes. **a**, Three-crossed-type [4]<sub>12</sub>-catenane **4**. **b**, Three-crossed-type [4]<sub>12</sub>-catenane **6** obtained from APP-sequenced ligand **5** and AgPF<sub>6</sub>. **c**, *T*<sub>2</sub>-type [4]<sub>12</sub>-catenane **8** obtained from IPP-sequenced ligand **7** and AgBF<sub>4</sub>. Counter anions and solvents are omitted for clarity. Ag(I) ions are represented as white spheres.

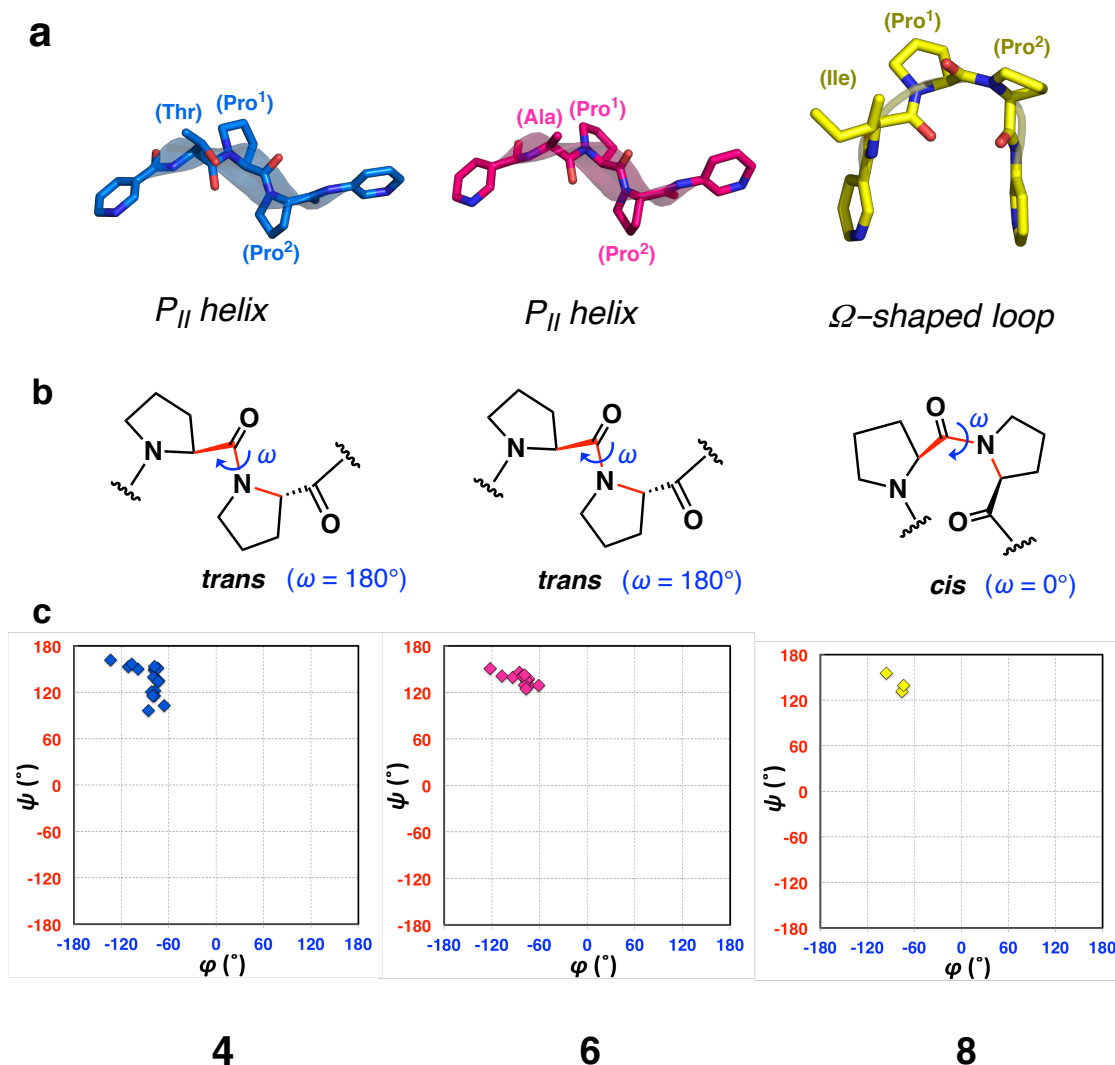

**Supplementary Figure 2 | Peptide conformations.** **a**, Typical peptide conformations observed in the crystal structures **4**, **6**, and **8**. **b**, The amide bond configurations between Pro-Pro residues. **c**, Ramachandran plots. Crystallographically independent six ligands for **3**, four ligands for **5** and one ligand for **7** were plotted respectively.



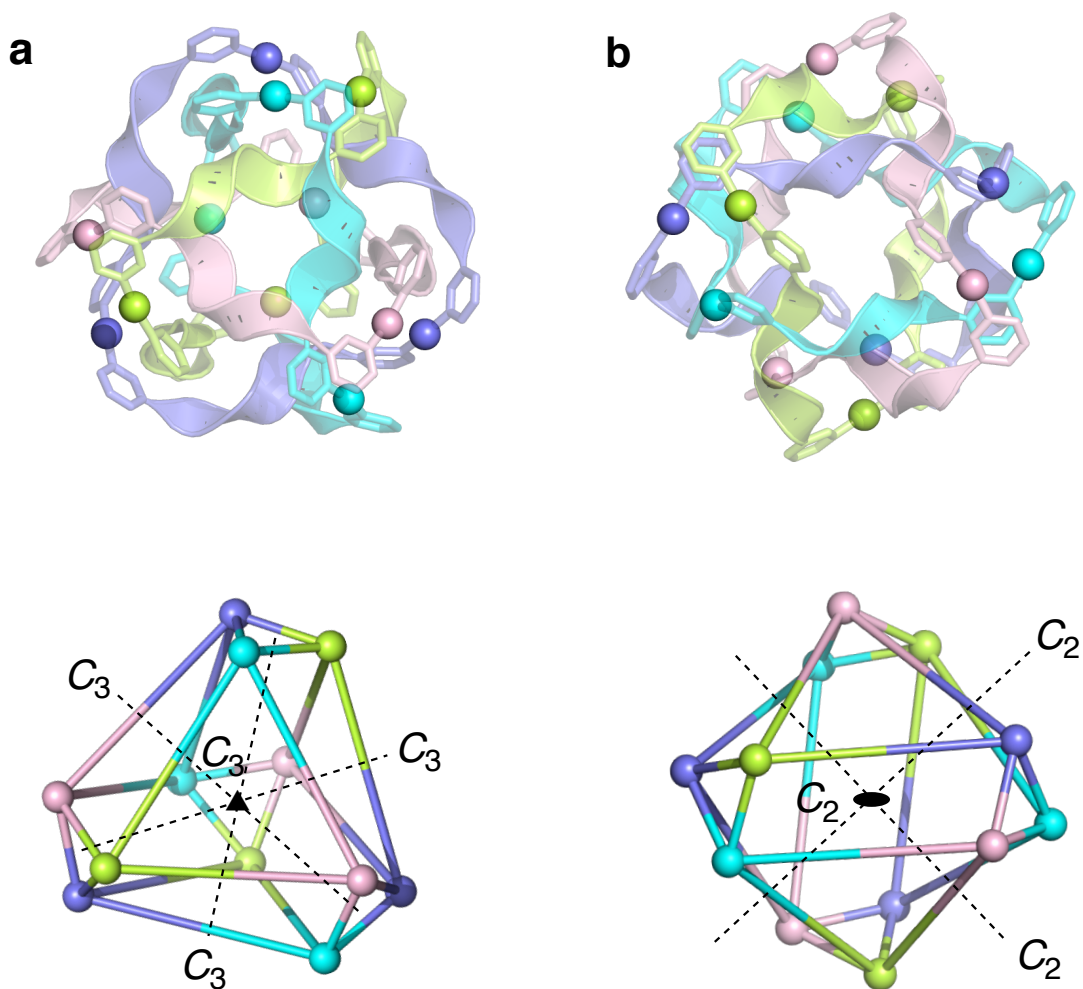

**Supplementary Figure 3 | *T*-symmetry of 4.** Four  $C_3$  axis (a) and three  $C_2$  axis (b) of the crystal structure of 4 are shown here. Cuboctahedron-like geometry of Ag(I) positions were extracted to below.

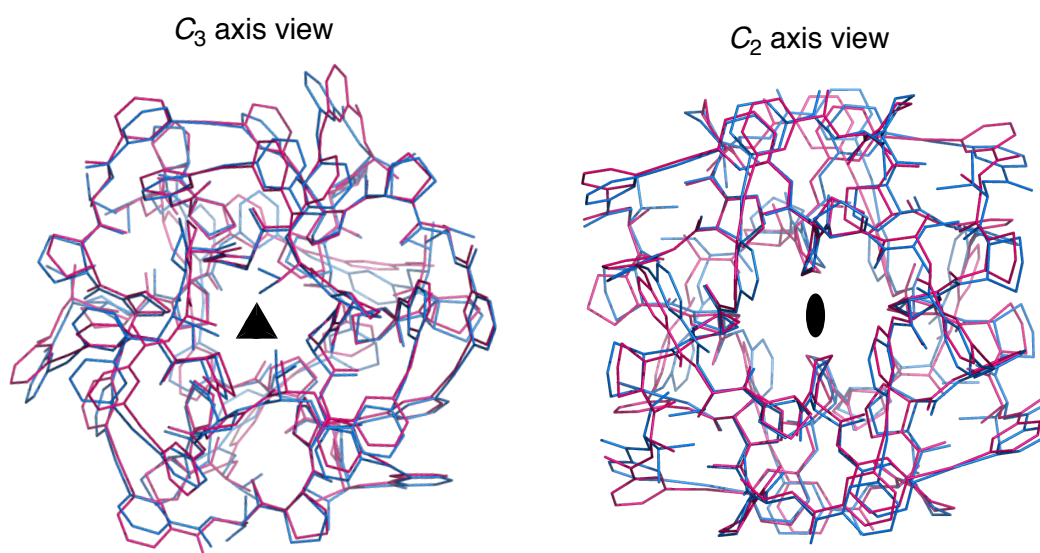

**Supplementary Figure 4 | Overlaid structures of three-crossed [4]<sub>12</sub>-catenanes.** Two crystal structures, **4** (*blue*) and **6** (*red*) are overlaid in line representation.

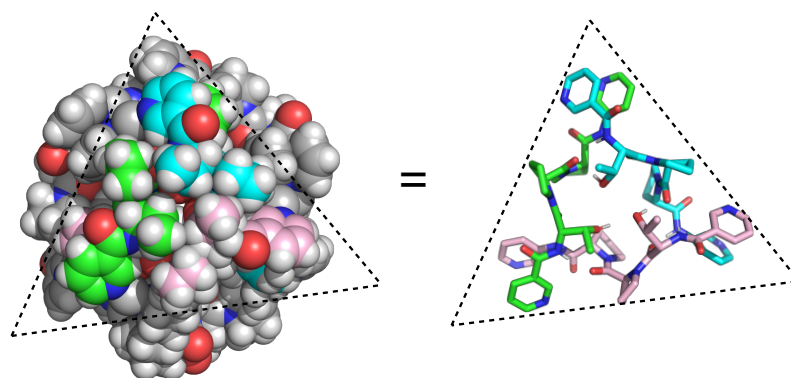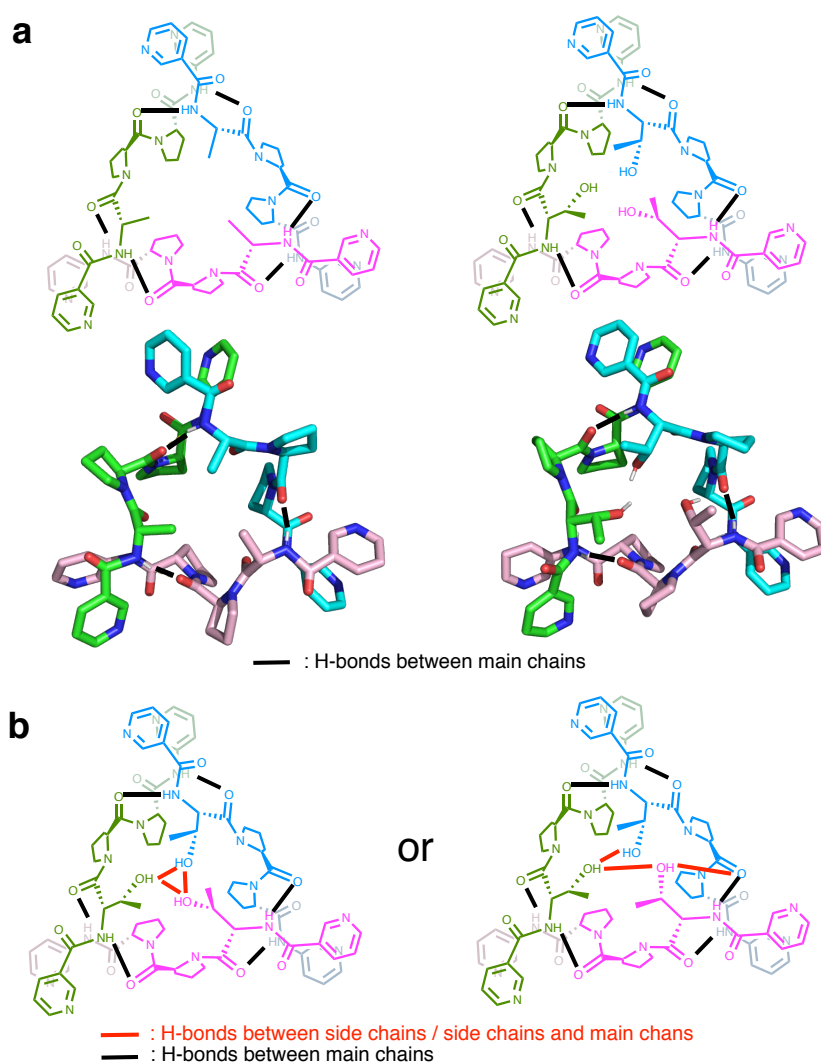

**Supplementary Figure 5 | H-bonds in the three-crossed geometry.** **a**, Six sets of H-bonds between main chains are observed in the structure of **6** and **4**. **b**, Six sets of H-bonds between main chains and three sets between side chains (threonine) are observed in the structure of **4**. H-bonds between side chains and main chains are also observed in the structure due to the flexibility of the ligands.

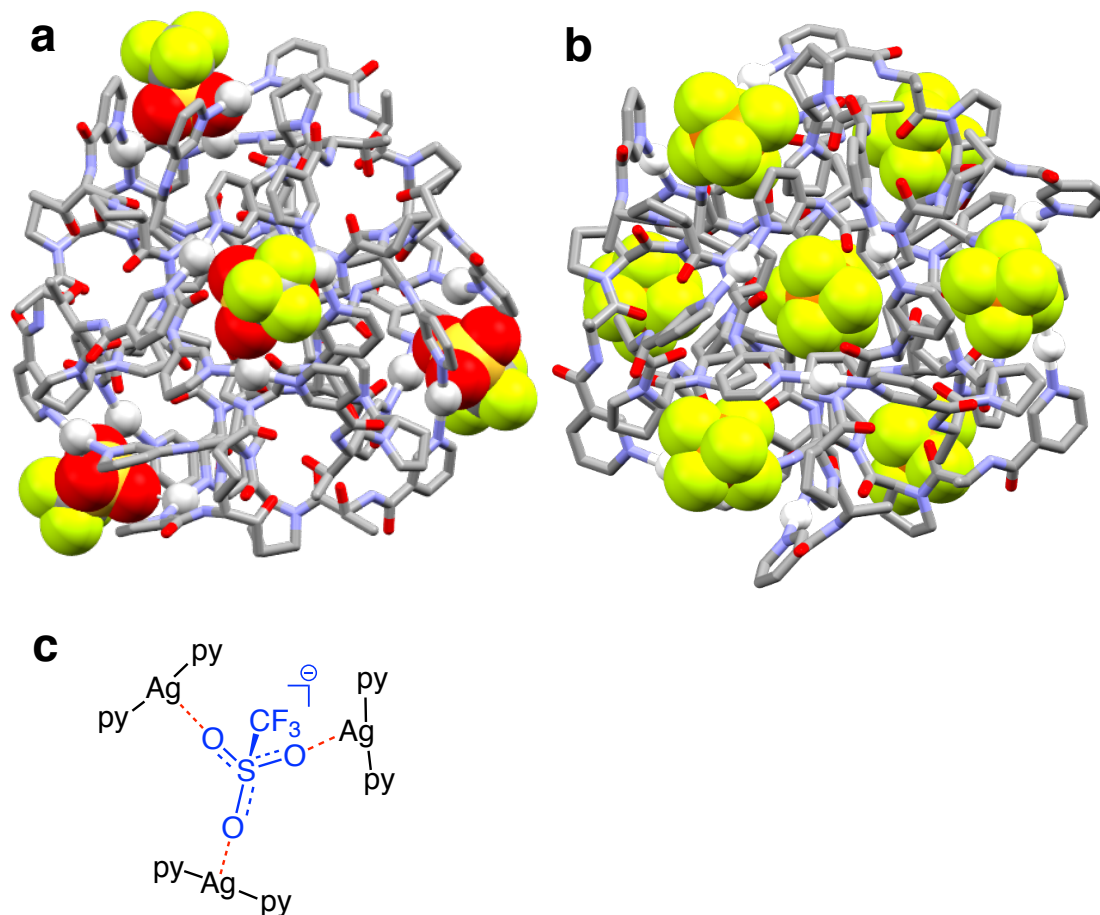

**Supplementary Figure 6 | Anions positions in the framework of the three-crossed [4]<sub>12</sub>-catenanes.** **a**, Triflate (OTf<sup>-</sup>) anions in the structure of **4** are highlighted in space-filing representation. **b**, PF<sub>6</sub><sup>-</sup> anions in the structure of **6** are highlighted in the space-filing representation. **c**, C<sub>3</sub> symmetry of triflate anion templates the triangle structure of Ag(I) in **4**, which suggests the possible reason for the quantitative [4]<sub>12</sub>-catenane formation only in the case of triflate anion (see also Supplementary Fig. 15).

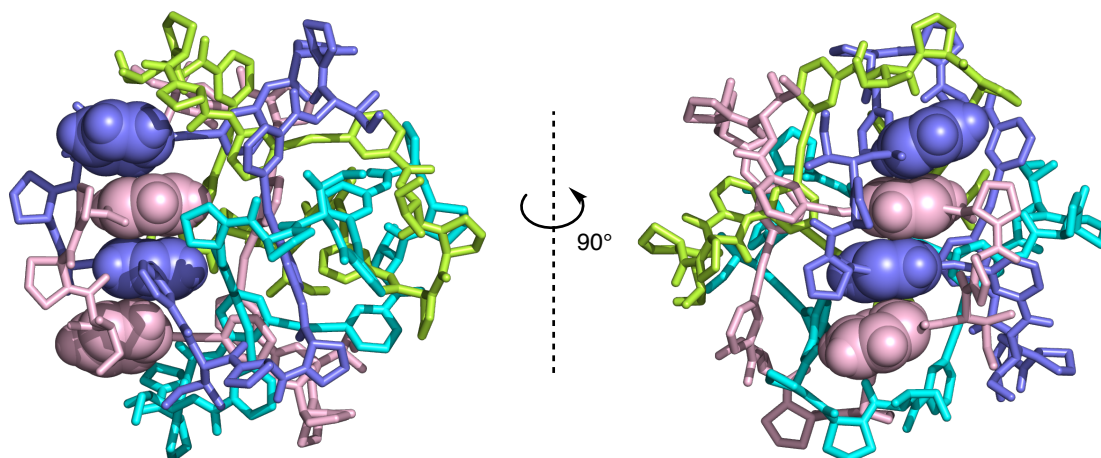

**Supplementary Figure 7 | Quadruple Stacking of pyridyl groups in the structure of  $T_2$ -[4]<sub>12</sub>-catenane 8.** Pyridyl groups highlighted in space-filling representation indicate quadruple stacking inducing the  $T_2$ -edge geometry similar to **2**.<sup>2</sup>

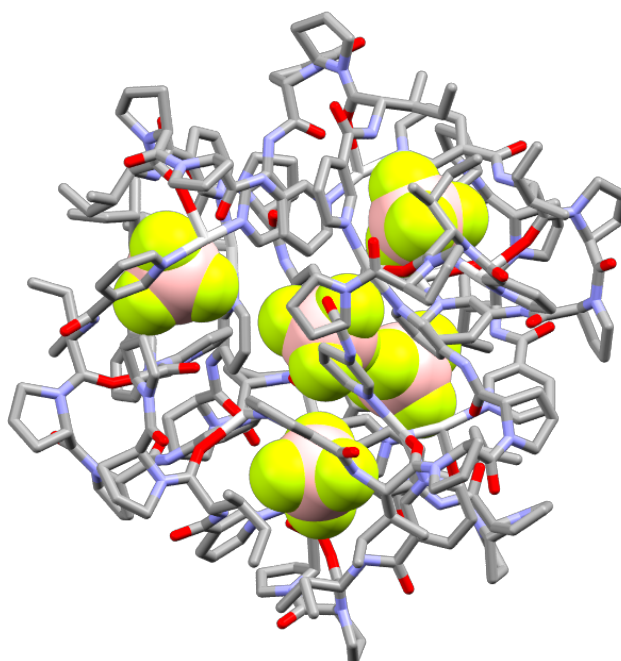

**Supplementary Figure 8 |  $\text{BF}_4^-$  positions in the framework of  $T_2$ -[4]<sub>12</sub>-catenane 8.** Five  $\text{BF}_4^-$  anions highlighted in space-filling representation induced the  $T_2$ -tetrahedral link framework. H-bonds are observed between anions and amide on the framework of the [4]<sub>12</sub>-catenane as seen in the structure of **2**.<sup>2</sup>

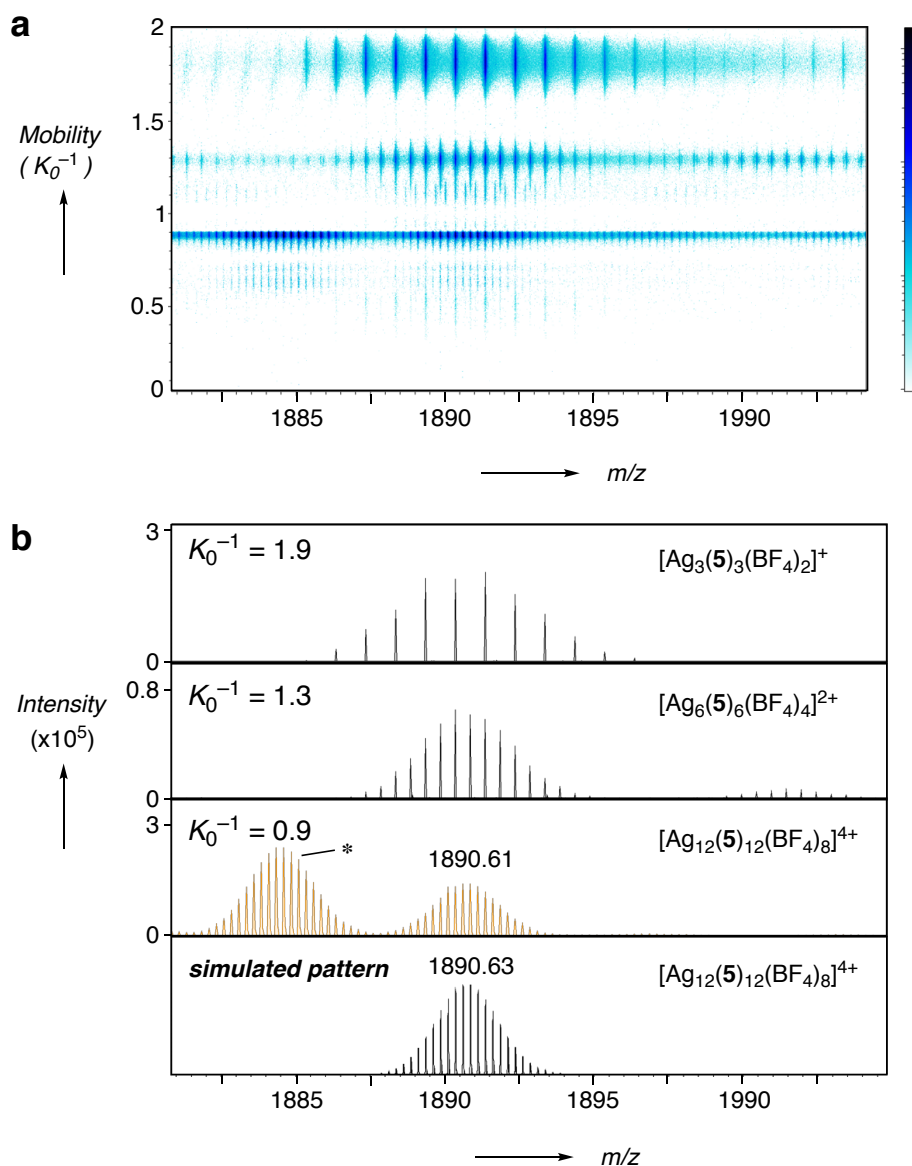

**Supplementary Figure 9 | Ion mobility mass spectrometry data of [4]<sub>12</sub>-catenane 6.** **a**, Mobility vs.  $m/z$  plot. **b**, Mass spectra at  $K_0^{-1} = 1.9$ ,  $K_0^{-1} = 1.3$ ,  $K_0^{-1} = 0.9$ , and simulated pattern of  $[\text{Ag}_{12}(\mathbf{5})_{12}(\text{BF}_4)_8]^{4+}$ . The set of peaks marked with an asterisk corresponds to  $[\text{Ag}_{12}(\mathbf{5})_{12}(\text{BF}_4)_7(\text{NO}_3)]^{4+}$ , which is derived from a small quantity of  $\text{AgNO}_3$  in the reagent grade  $\text{AgBF}_4$ .

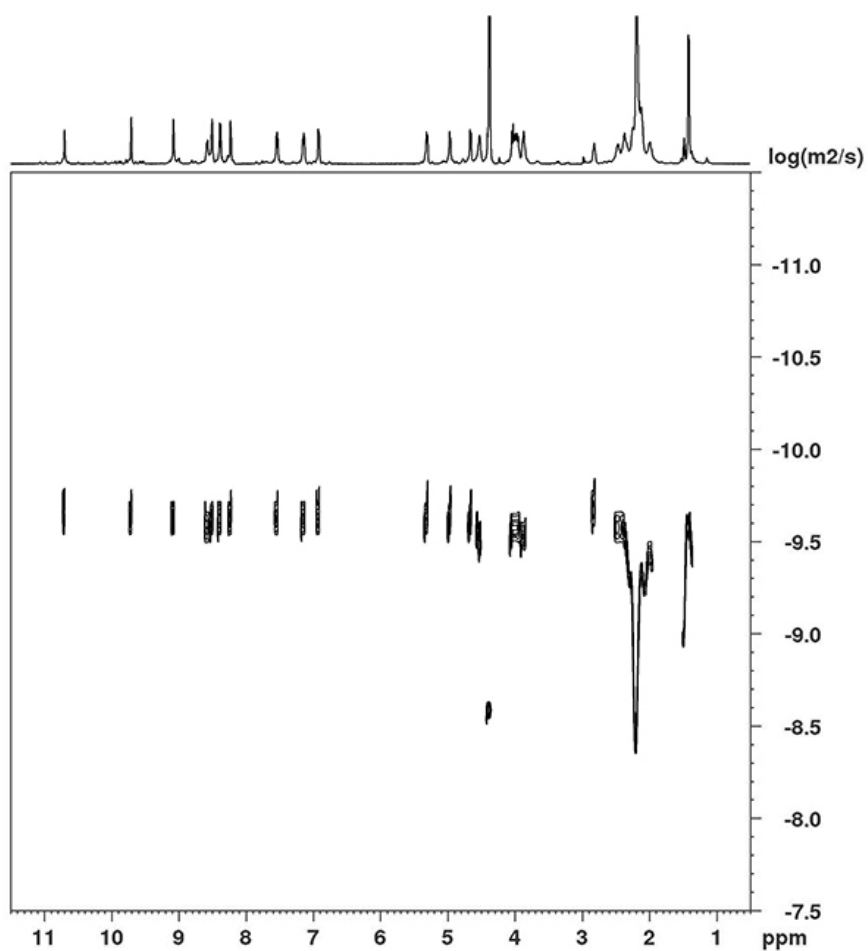

**Supplementary Figure 10 |  $^1\text{H}$  DOSY spectrum of  $[4]_{12}$ -catenane **4**.** The spectrum indicates a single product with a diffusion coefficient  $D$  of  $2.4 \times 10^{-10} \text{ m}^2 \text{ s}^{-1}$  ( $\log D = -9.62$ ). 500 MHz,  $\text{CD}_3\text{NO}_2$ , 300 K.

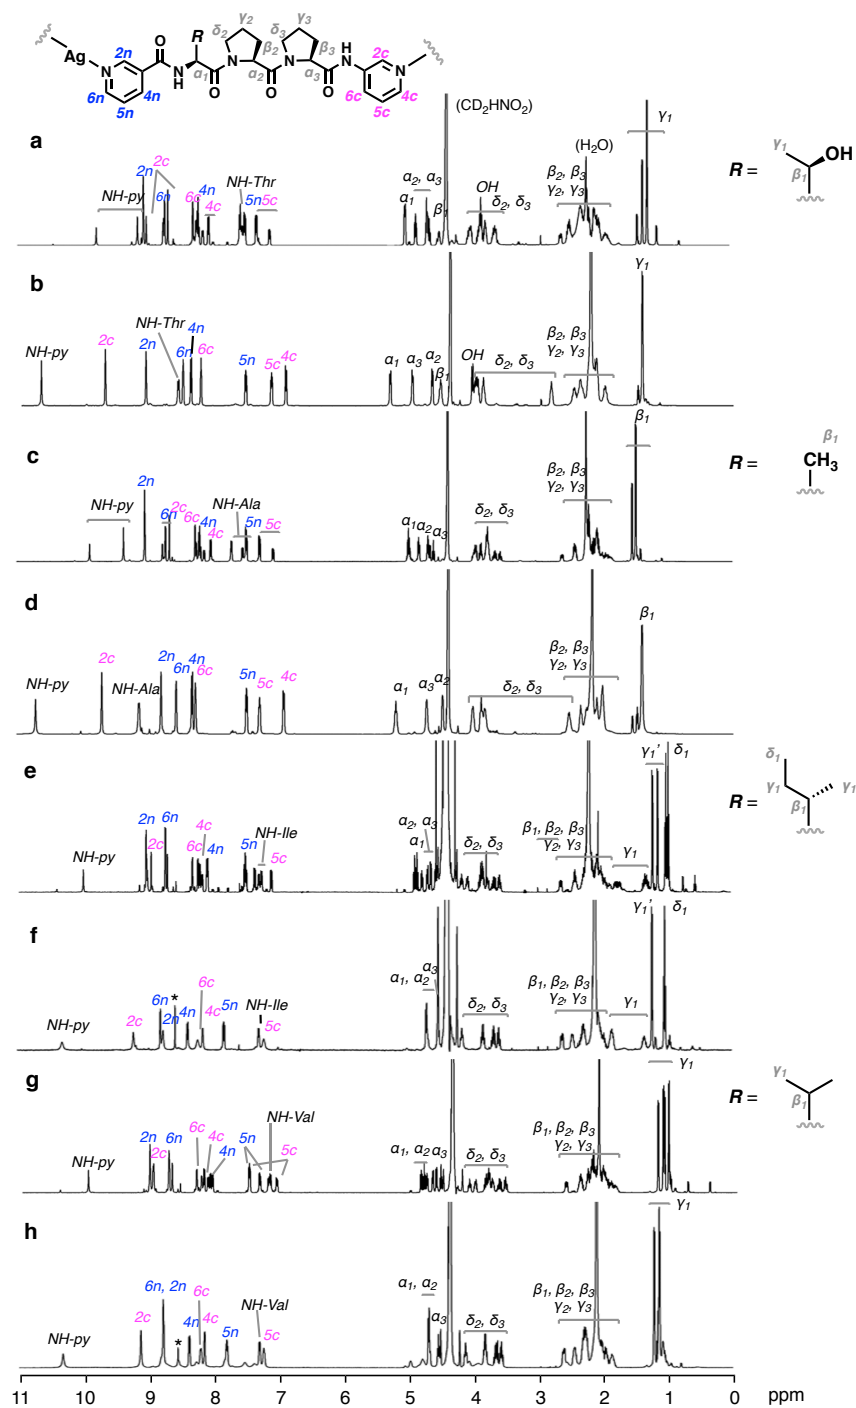

**Supplementary Figure 11 |  $^1\text{H}$  NMR spectra before and after self-assembly of [4]<sub>12</sub>-catenanes.**  $^1\text{H}$  NMR spectra (500 MHz,  $\text{CD}_3\text{NO}_2$ , 300 K) of **a**, ligand **3**, **b**, [4]<sub>12</sub>-catenane **4** (counter anion:  $\text{OTf}^-$ ), **c**, ligand **5**, **d**, [4]<sub>12</sub>-catenane **6** (counter anion:  $\text{OTf}_2^-$ ), **e**, ligand **7**, **f**, [4]<sub>12</sub>-catenane **8** (counter anion:  $\text{BF}_4^-$ ), **g**, ligand **9**, and **h**, [4]<sub>12</sub>-catenane **10** (counter anion:  $\text{BF}_4^-$ ). Note that conformers exist in **a**, **c**, **e**, and **g** owing to the structural flexibility of the short peptide ligands. The signals derived from  $\text{CD}_3\text{NO}_2$  are marked with asterisks.



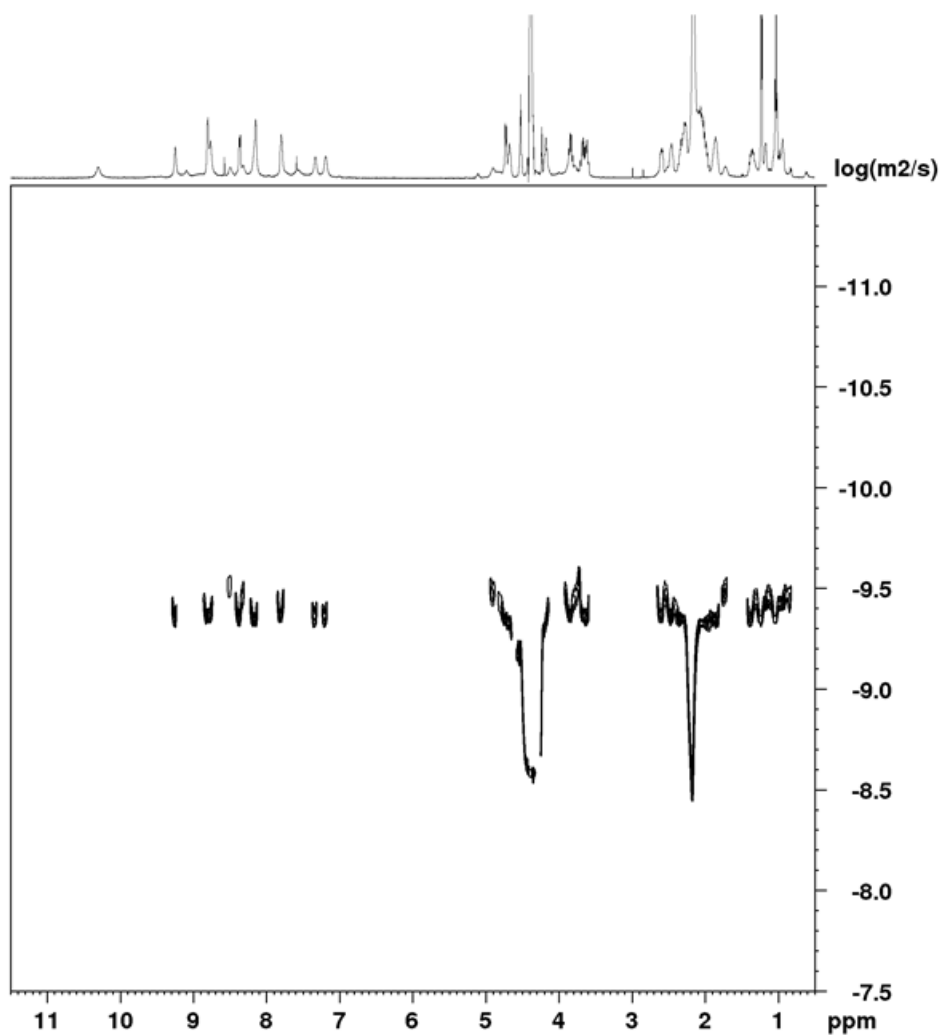

**Supplementary Figure 12** |  $^1\text{H}$  DOSY spectrum of  $[4]_{12}$ -catenane **8**. The spectrum indicates a single product with a diffusion coefficient  $D$  of  $4.3 \times 10^{-10} \text{ m}^2 \text{ s}^{-1}$  ( $\log D = -9.36$ ). 500 MHz,  $\text{CD}_3\text{NO}_2$ , 300 K.

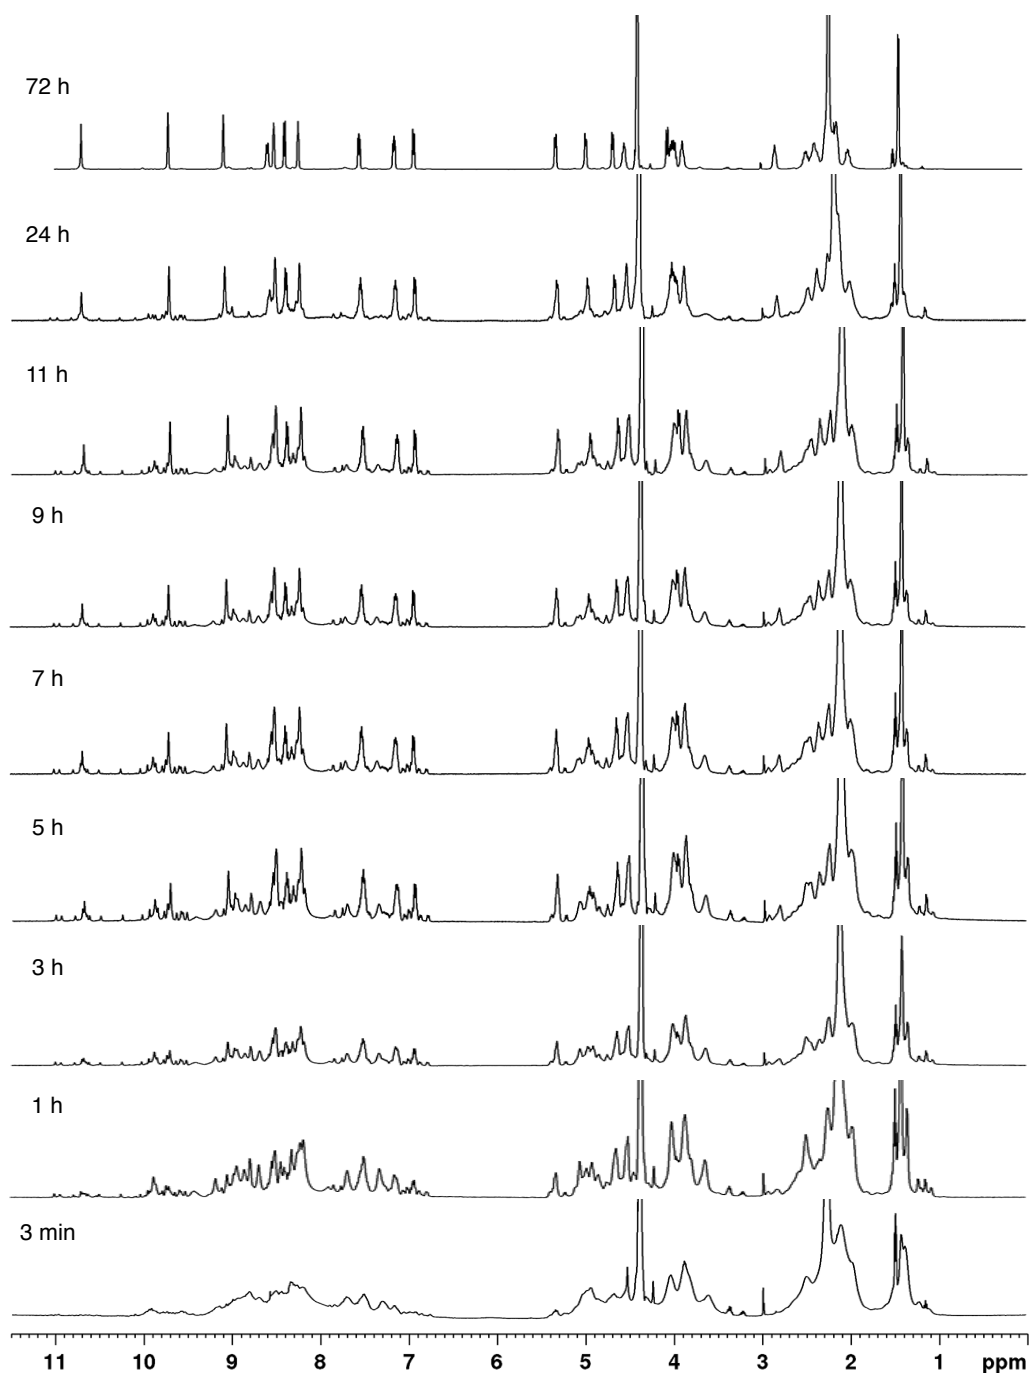

**Supplementary Figure 13 | Time-dependent change of formation of 4.** (500 MHz,  $\text{CD}_3\text{NO}_2$ ). For initial 3 min ~ 11 h, reaction temperature was kept at 323 K in order to speed up the change. For 24 ~ 72 h, that was kept at 300 K. The broad signals just after mixing of ligand **3** and Ag(I) solution starts to change into 10 peaks at aromatic regions in 3 h, then completely converged in 72 h.

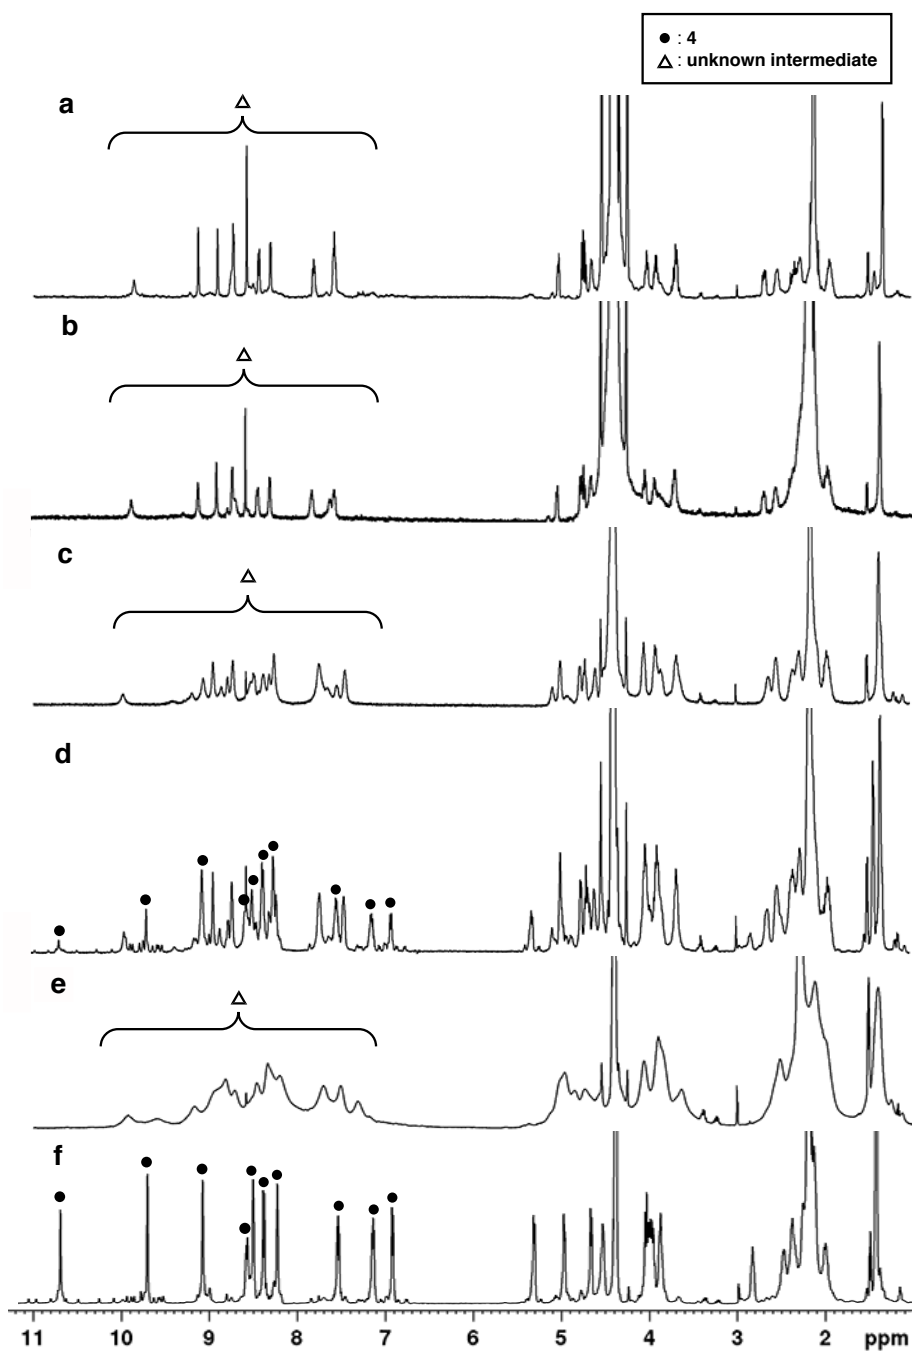

**Supplementary Figure 14 | Initial concentration effect on formation of 4.** (500 MHz,  $\text{CD}_3\text{NO}_2$ , 300 K). **a**, 1 mM (just after mixing). **b**, 1 mM (after standing for 2 d). **c**, 10 mM (just after mixing). **d**, 10 mM (after standing for 2 d). **e**, 50 mM (just after mixing). **f**, 50 mM (after standing for 2 d). Higher concentration (50 mM) is preferred to formation of **4**. At lower concentration (~10 mM), complexation is trapped into the stable intermediates (the structure is unknown).

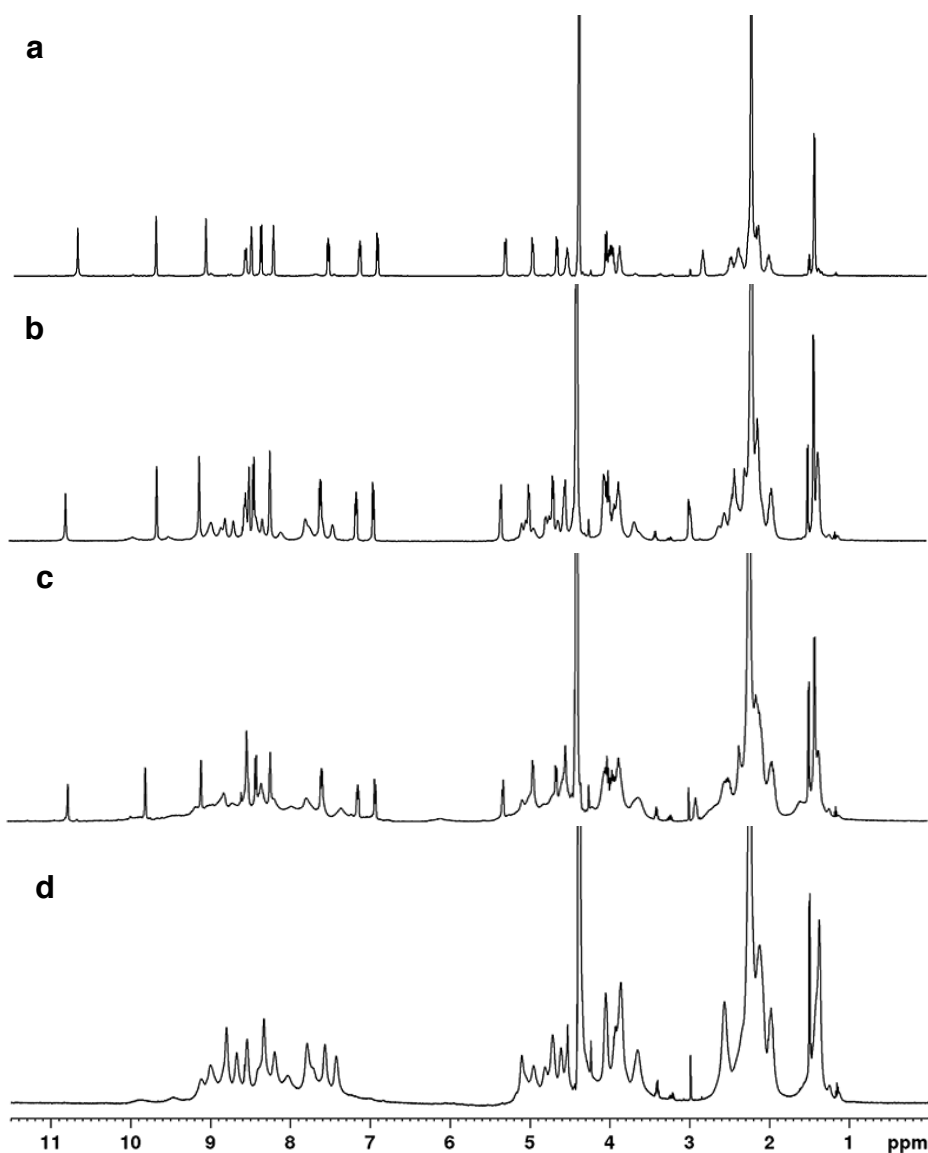

**Supplementary Figure 15 | Counter anion dependence on formation of 4.** (500 MHz,  $\text{CD}_3\text{NO}_2$ , 300 K). **a**,  $3+\text{AgOTf}$ . **b**,  $3+\text{AgPF}_6$ . **c**,  $3+\text{AgBF}_4$ . **d**,  $3+\text{AgNTf}_2$ . ( $[\mathbf{3}] = [\text{Ag}^+] = 50 \text{ mM}$ , after standing at r.t. for *ca* 2 d). The spectra **b** and **c** shows that minor broad peaks remained among the major sharp peaks. The spectrum **d** shows no converged pattern. These results revealed that  $\text{OTf}^-$  was the most suitable counter anion for inducing three-crossed  $[\mathbf{4}]_{12}$ -catenane framework **4**. See also Supplementary Fig. 6c.

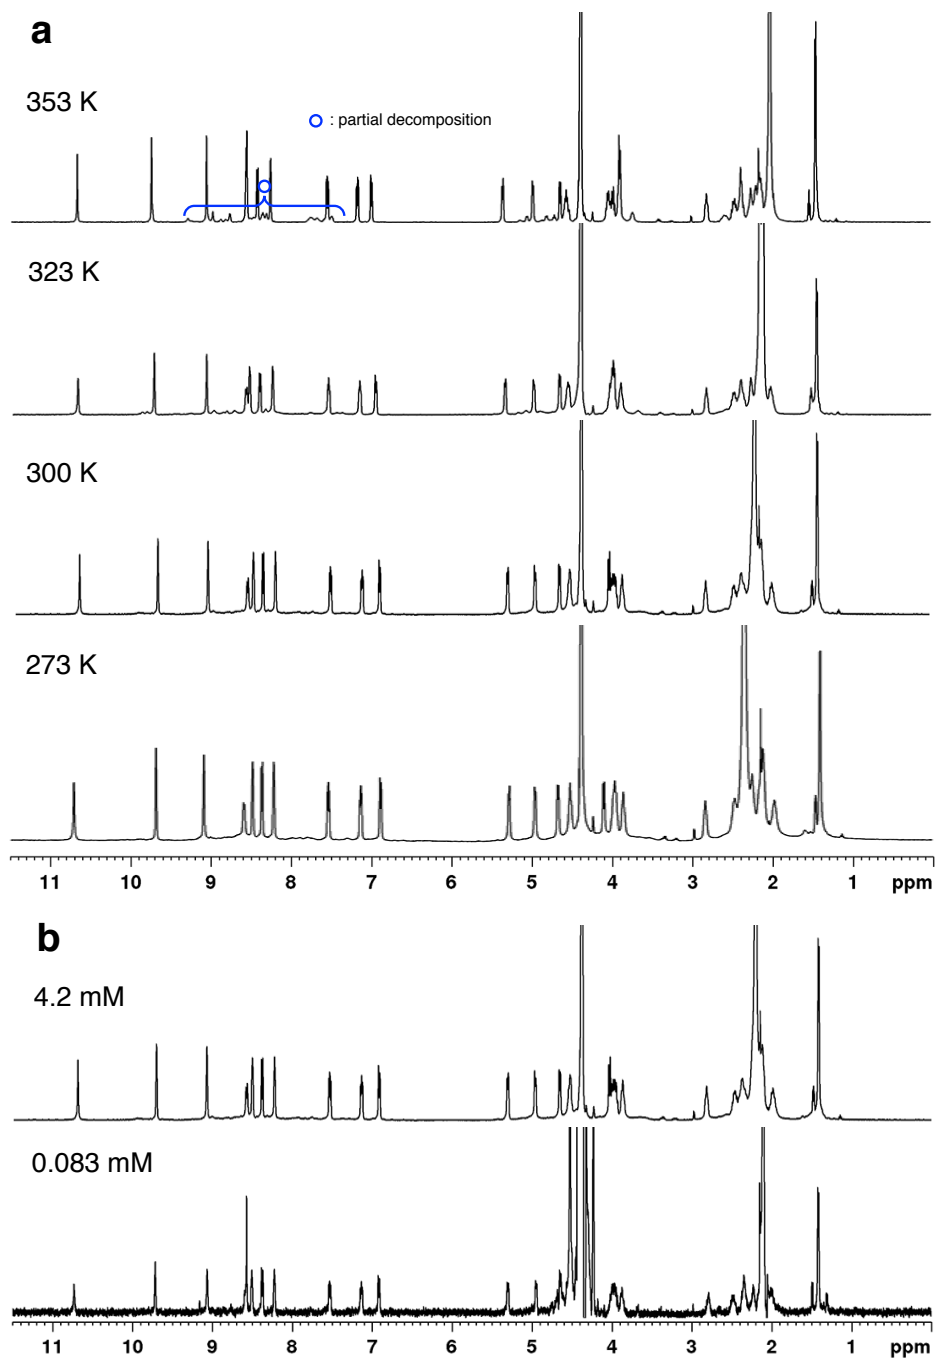

**Supplementary Figure 16 | Stability test of 4 in solution state.** (500 MHz,  $\text{CD}_3\text{NO}_2$ , 300 K). **a**, Temperature stability of **4**. The signal pattern does not show significant change from 273 K to 353 K without partial decomposition at 353 K. **b**, Dilution test after the formation of **4** ( $[\mathbf{4}] = 4.2 \text{ mM}$  to  $8.3 \times 10^{-2} \text{ mM}$ ).

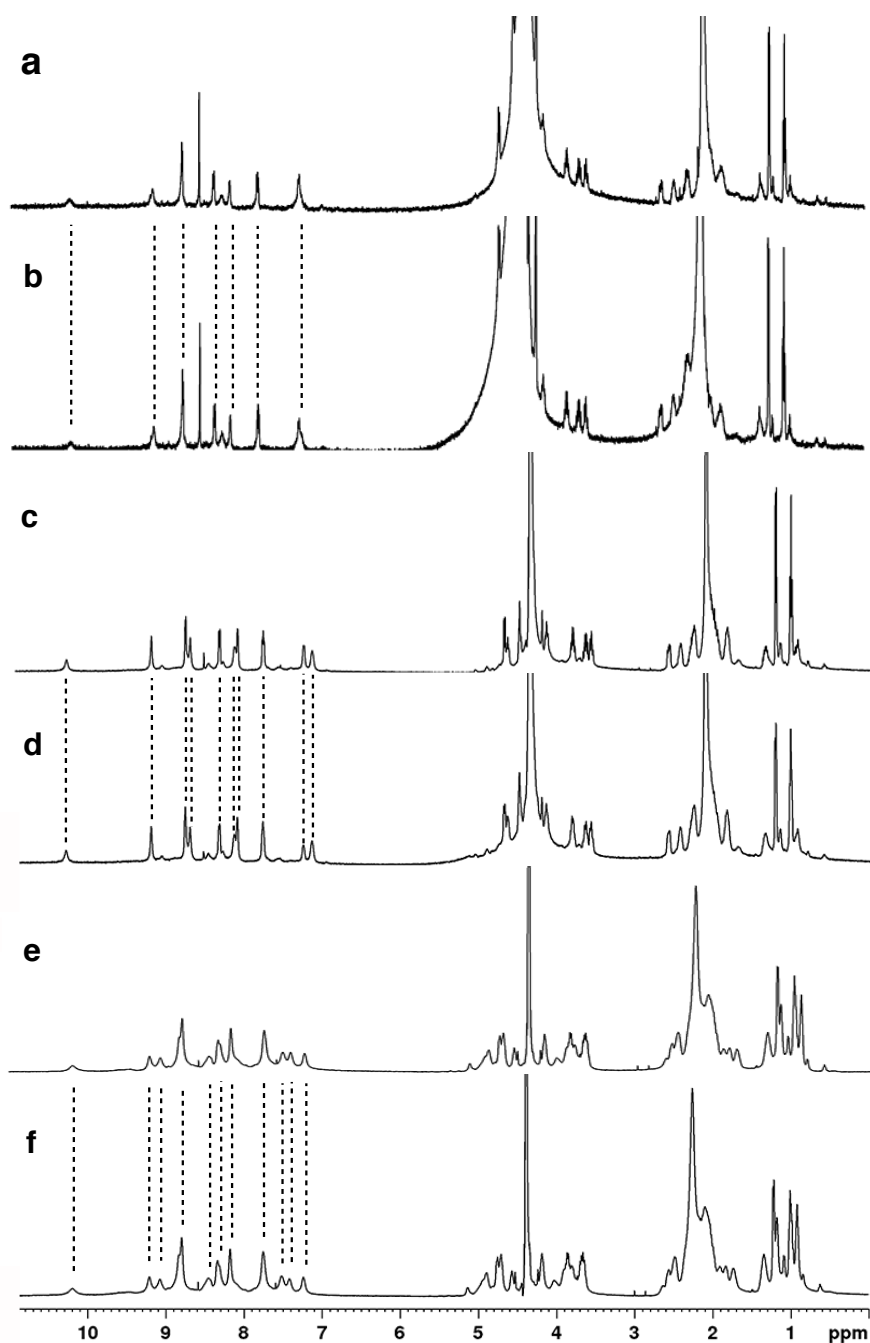

**Supplementary Figure 17 | Initial concentration effect on formation of 8.** (500 MHz,  $\text{CD}_3\text{NO}_2$ , 300 K). **a**, 1 mM (just after mixing), **b**, 1 mM (after standing for 2 d), **c**, 10 mM (just after mixing), **d**, 10 mM (after standing for 2 d), **e**, 50 mM (just after mixing), **f**, 50 mM (after standing for 2 d). Lower concentration ( $\leq 10$  mM) is suitable for  $T_2$ -[4]<sub>12</sub>-catenane formation. Compared to the case of three-crossed [4]<sub>12</sub>-catenane, no significant initial concentration effect and time-dependent change are observed in this case.

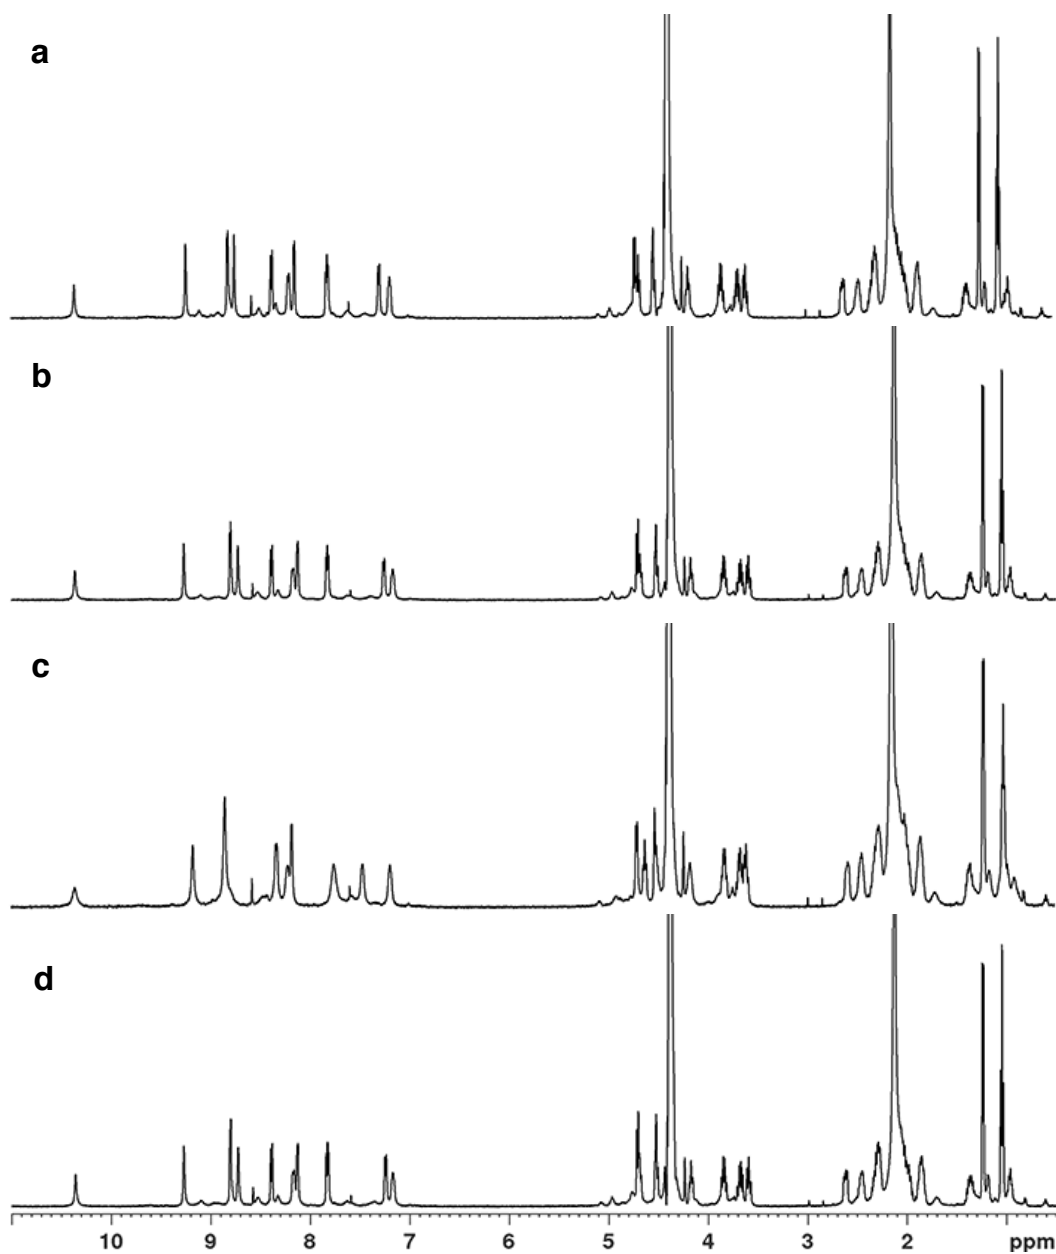

**Supplementary Figure 18 | Counter anion dependence on formation of 8.** (500 MHz, CD<sub>3</sub>NO<sub>2</sub>, 300 K). **a**, 7+AgBF<sub>4</sub>, **b**, 7+AgPF<sub>6</sub>, **c**, 7+AgOTf, **d**, 7+AgNTf<sub>2</sub>, ([7] = [Ag<sup>+</sup>] = 10 mM, mixed for 1 min by using a vortex mixer). Similar pattern among **a**, **b** and **c** suggests that the shape of counter anion is not dominant for the formation of **8**.

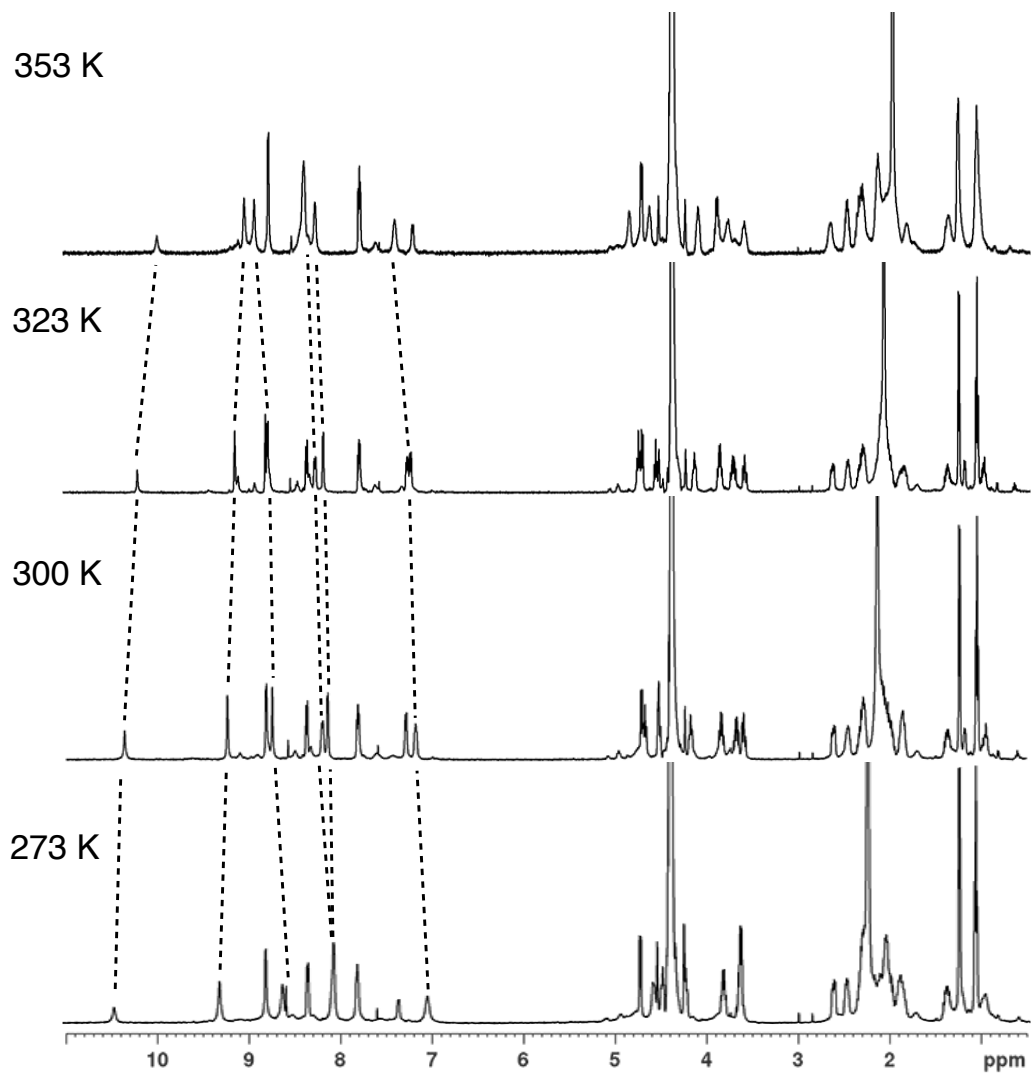

**Supplementary Figure 19 | Temperature dependence on 8.** (500 MHz, CD<sub>3</sub>NO<sub>2</sub>, [7] = [Ag<sup>+</sup>] = 10 mM, mixed for 1 min by using vortex). Dashed lines show the peak shifts. Unlike the case of three-crossed [4]<sub>12</sub>-catenane (see also Supplementary Fig. 16a), slight peak shifts are observed depending on measurement temperature in the case of *T*<sub>2</sub>-[4]<sub>12</sub>-catenane.



## Characterisation of 4

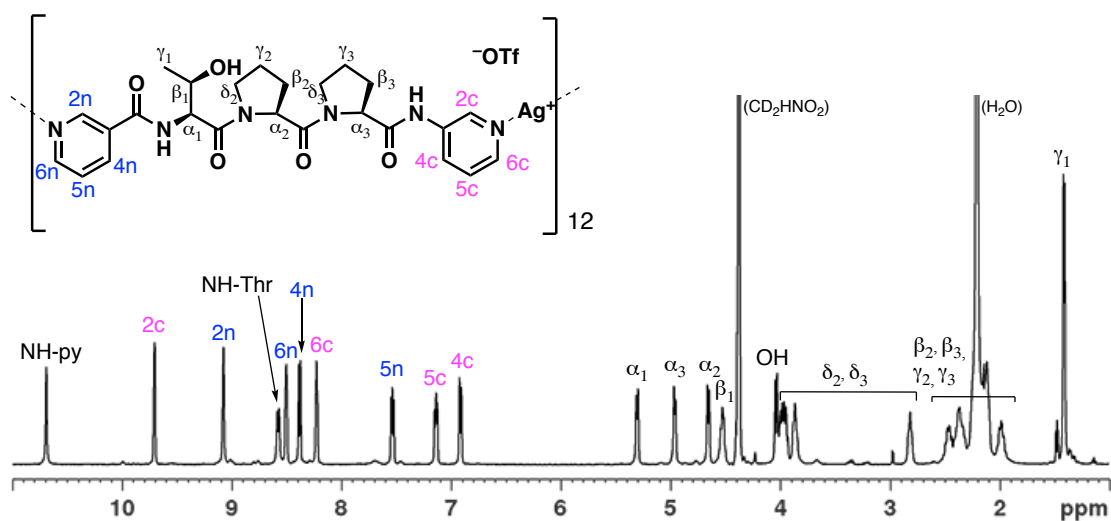

**Supplementary Figure 20** |  $^1\text{H}$  NMR spectrum of 4 (counter anion:  $\text{OTf}^-$ ) (500 MHz,  $\text{CD}_3\text{NO}_2$ , 300 K).

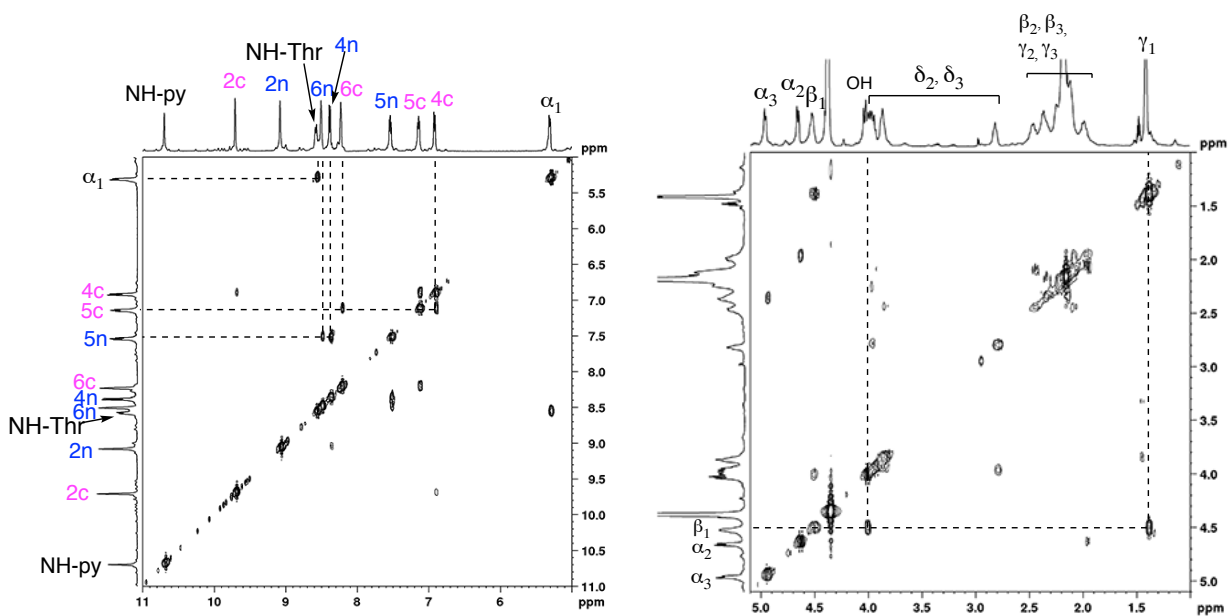

**Supplementary Figure 21** |  $^1\text{H}$ - $^1\text{H}$  COSY spectra of 4 (counter anion:  $\text{OTf}^-$ ) (500 MHz,  $\text{CD}_3\text{NO}_2$ , 300 K).

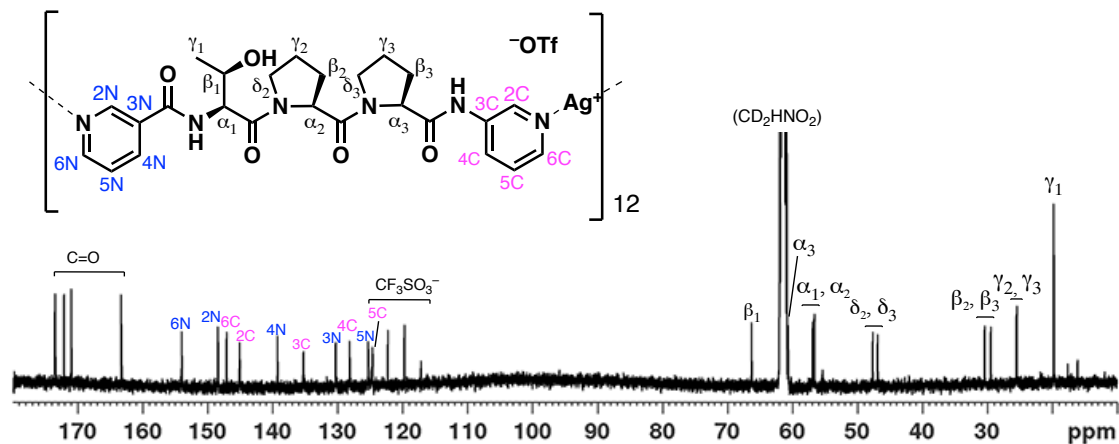

**Supplementary Figure 22** |  $^{13}\text{C}$  NMR spectrum of **4** (counter anion:  $\text{OTf}^-$ ) (125 MHz,  $\text{CD}_3\text{NO}_2$ , 300 K).

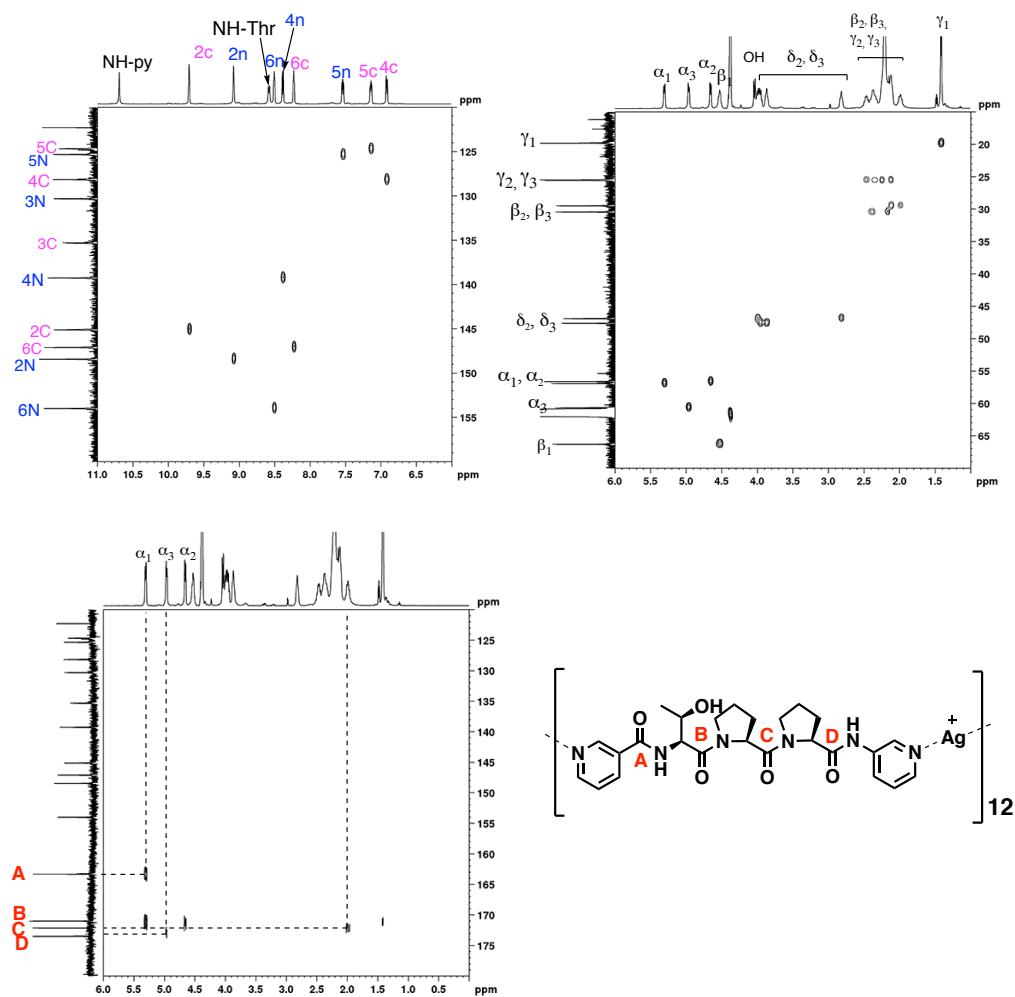

**Supplementary Figure 23** |  $^1\text{H}$ - $^{13}\text{C}$  HSQC spectra (upper) and HMBC spectrum (bottom) of **4** (counter anion:  $\text{OTf}^-$ ) ( $\text{CD}_3\text{NO}_2$ , 300 K).

## Characterisation of **6**

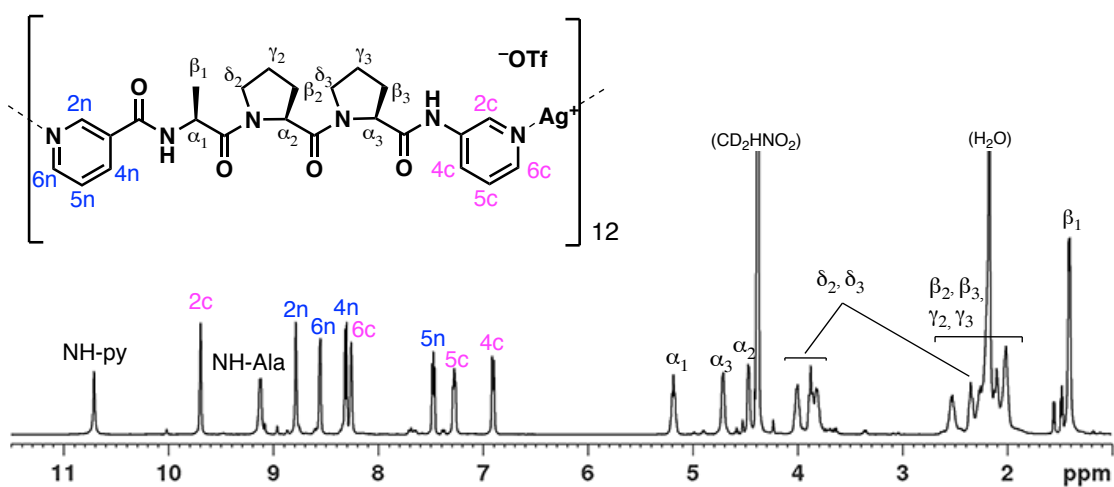

**Supplementary Figure 24** | <sup>1</sup>H NMR spectrum of **6** (counter anion: OTf<sup>-</sup>) (500 MHz, CD<sub>3</sub>NO<sub>2</sub>, 300 K).

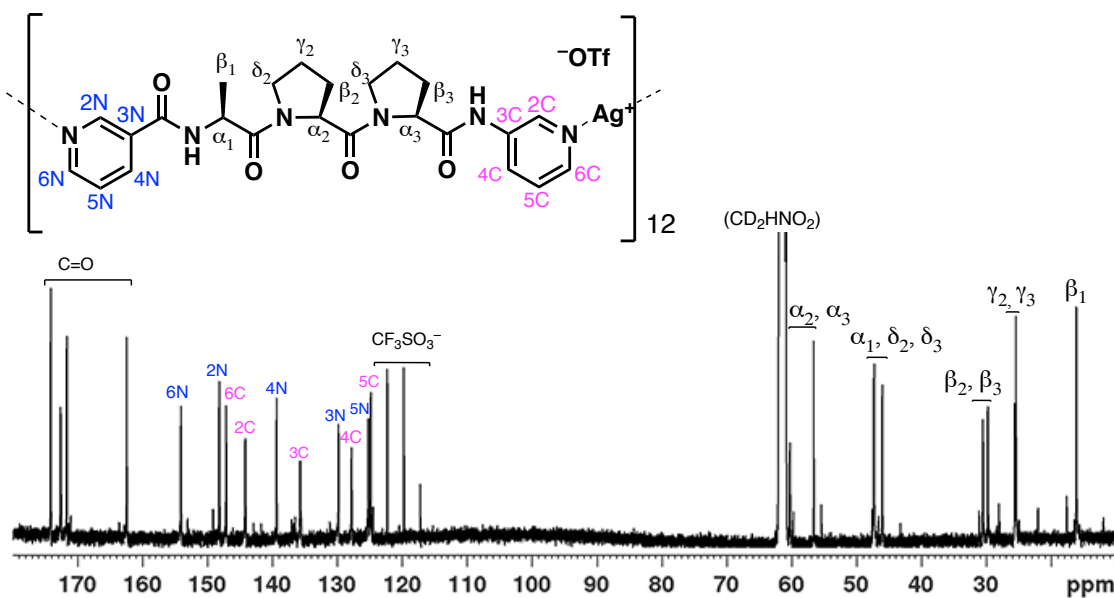

**Supplementary Figure 25** | <sup>13</sup>C NMR spectrum of **6** (counter anion: OTf<sup>-</sup>) (125 MHz, CD<sub>3</sub>NO<sub>2</sub>, 300 K).

## Characterisation of **8**

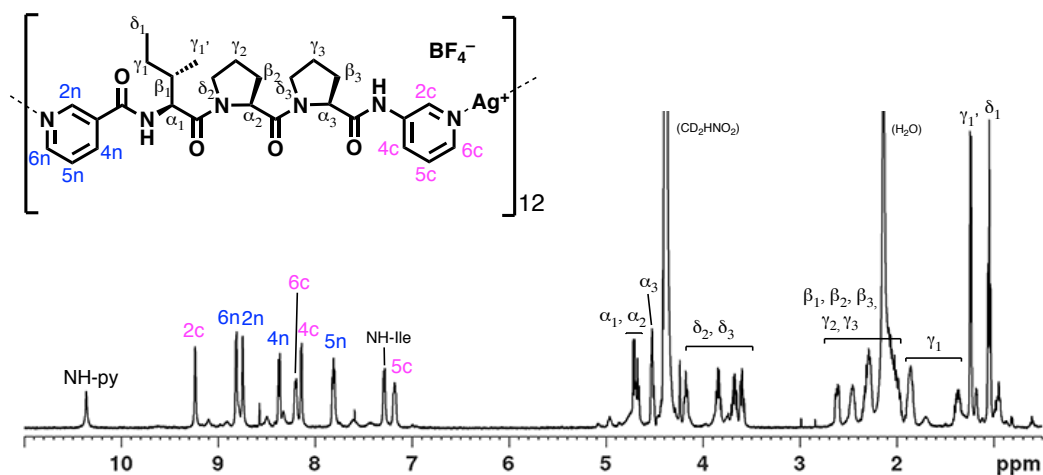

**Supplementary Figure 26** | <sup>1</sup>H NMR spectrum of **8** (counter anion: BF<sub>4</sub><sup>-</sup>) (500 MHz, CD<sub>3</sub>NO<sub>2</sub>, 300 K).

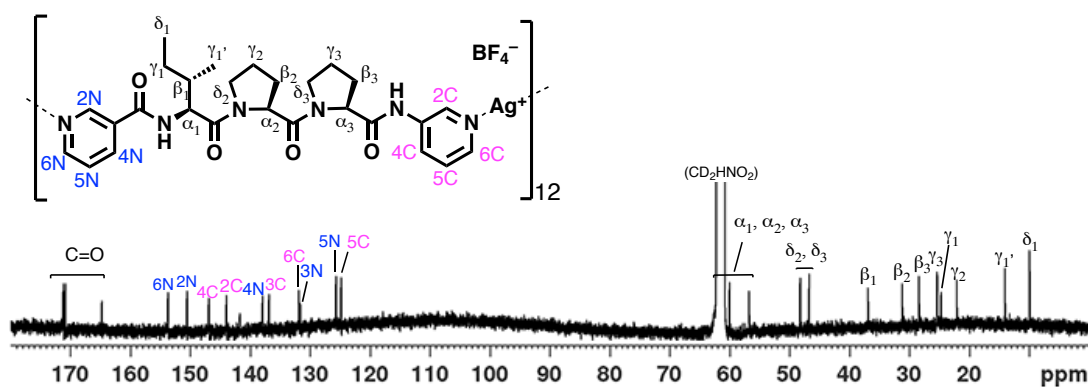

**Supplementary Figure 27** | <sup>13</sup>C NMR spectrum of **8** (counter anion: BF<sub>4</sub><sup>-</sup>) (125 MHz, CD<sub>3</sub>NO<sub>2</sub>, 300 K).

## Characterisation of **10**

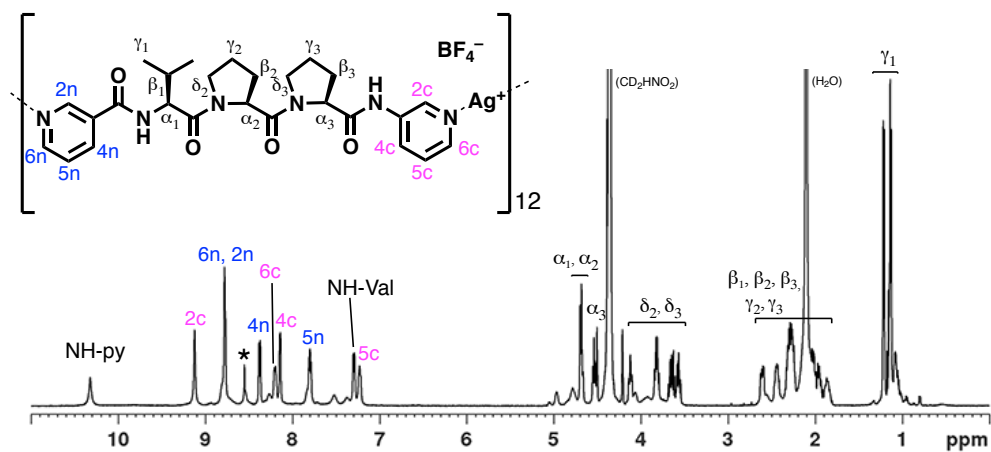

**Supplementary Figure 28** | <sup>1</sup>H NMR spectrum of **10** (counter anion: BF<sub>4</sub><sup>-</sup>) (500 MHz, CD<sub>3</sub>NO<sub>2</sub>, 300 K). The signal derived from CD<sub>3</sub>NO<sub>2</sub> are indicated by asterisk.

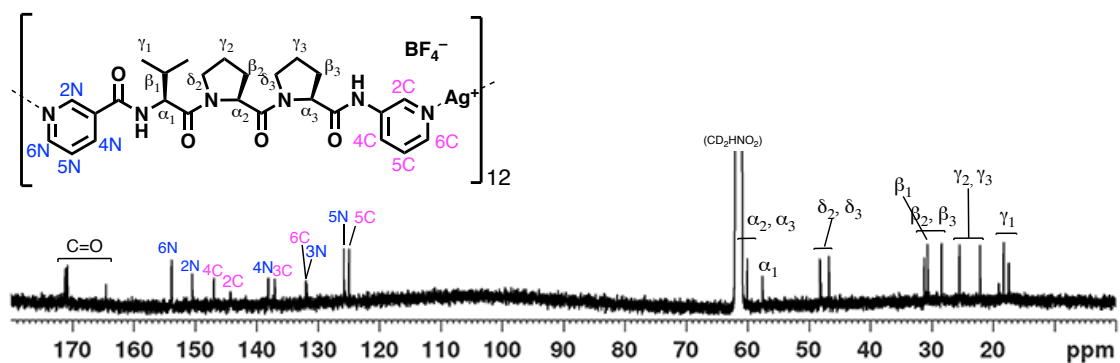

**Supplementary Figure 29** | <sup>13</sup>C NMR spectrum of **10** (counter anion: BF<sub>4</sub><sup>-</sup>) (125 MHz, CD<sub>3</sub>NO<sub>2</sub>, 300 K).

## NMR Spectra of S2–S5 and ligands 3, 5, 7, and 9

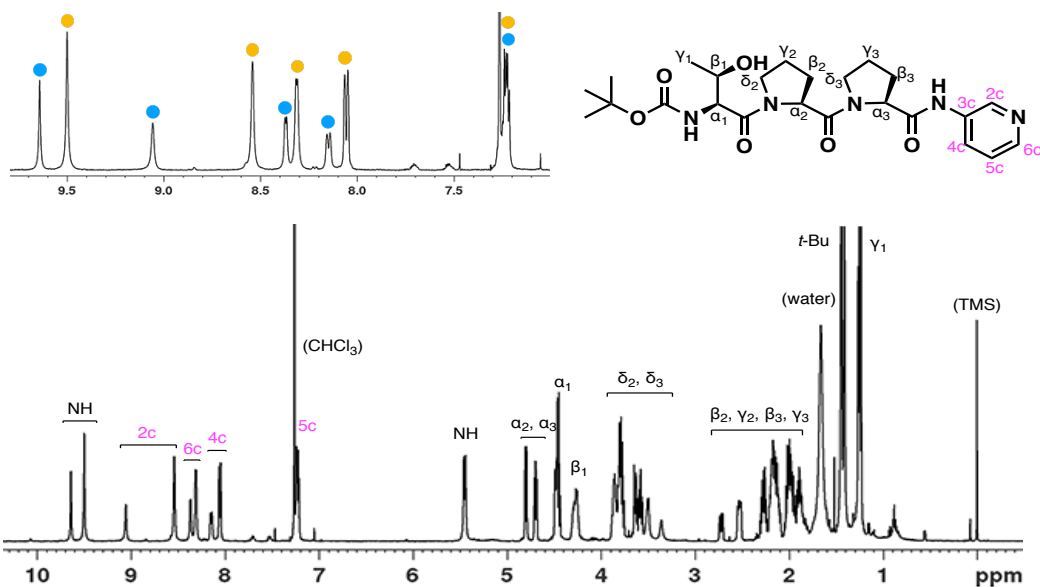

**Supplementary Figure 30** | <sup>1</sup>H NMR spectrum (500 MHz, CDCl<sub>3</sub>, 300 K) of S2 (conformers exist).

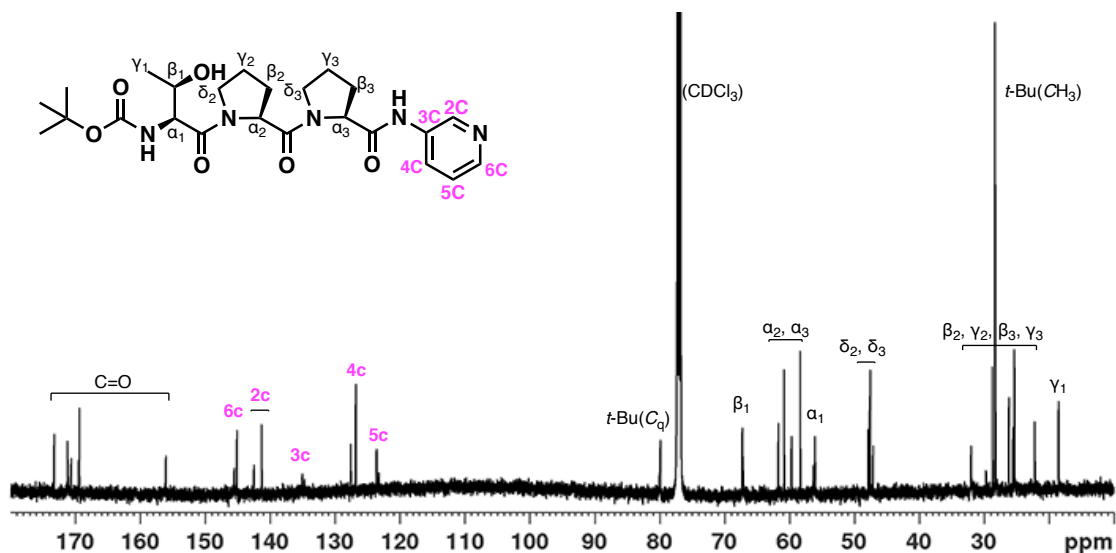

**Supplementary Figure 31** | <sup>13</sup>C NMR spectrum (125 MHz, CDCl<sub>3</sub>, 300 K) of S2 (conformers exist).

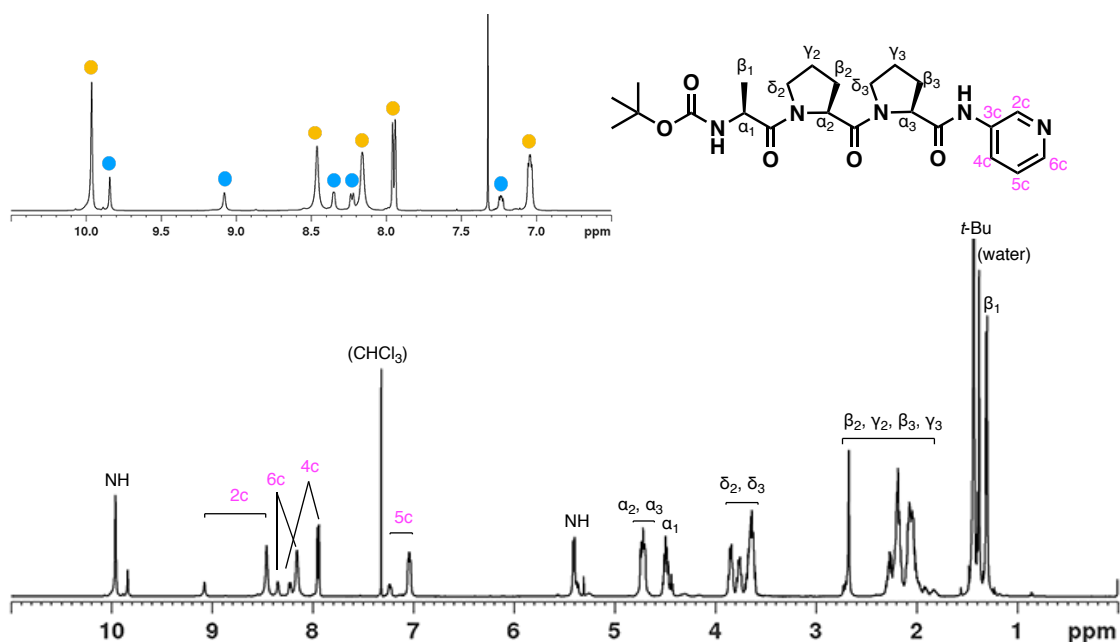

**Supplementary Figure 32** |  $^1\text{H}$  NMR spectrum (500 MHz,  $\text{CDCl}_3$ , 300 K) of **S3** (conformers exist).

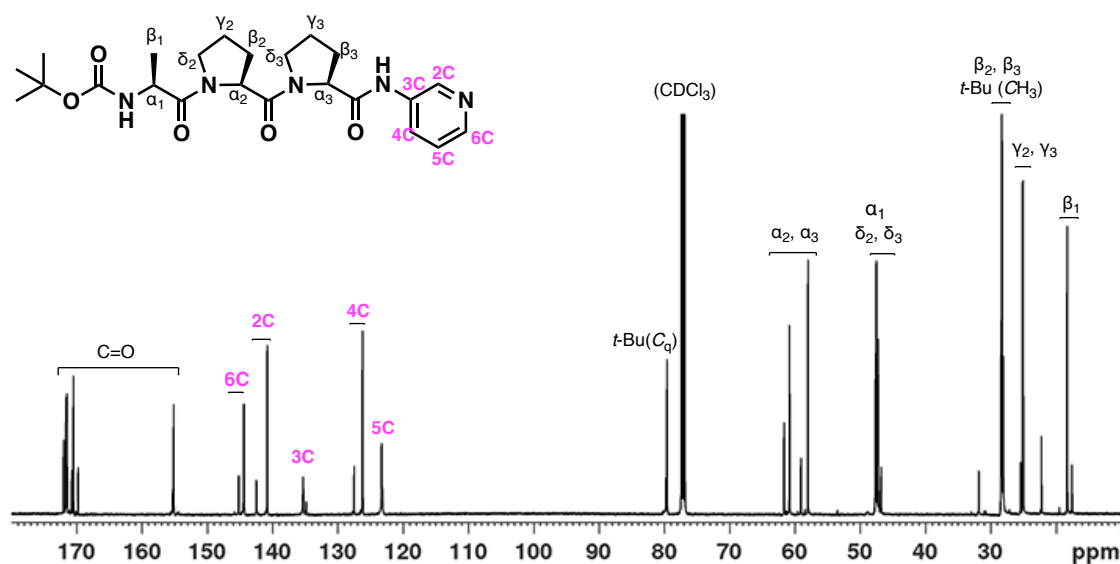

**Supplementary Figure 33** |  $^{13}\text{C}$  NMR spectrum (125 MHz,  $\text{CDCl}_3$ , 300 K) of **S3** (conformers exist).

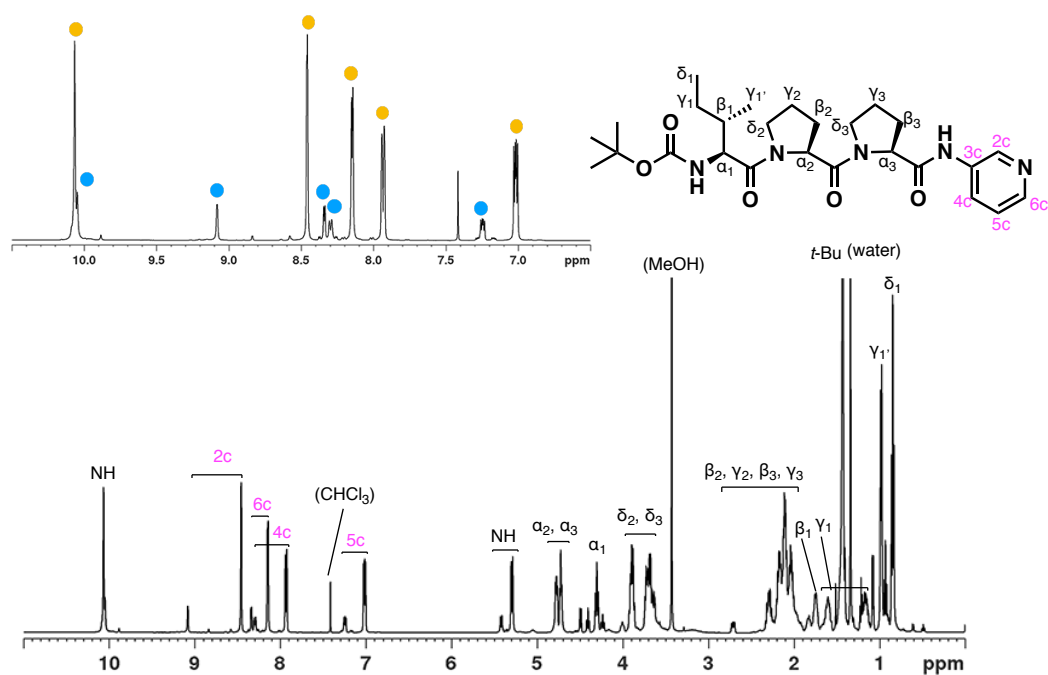

**Supplementary Figure 34** |  $^1\text{H}$  NMR spectrum (500 MHz,  $\text{CDCl}_3$ , 300 K) of **S4** (conformers exist).

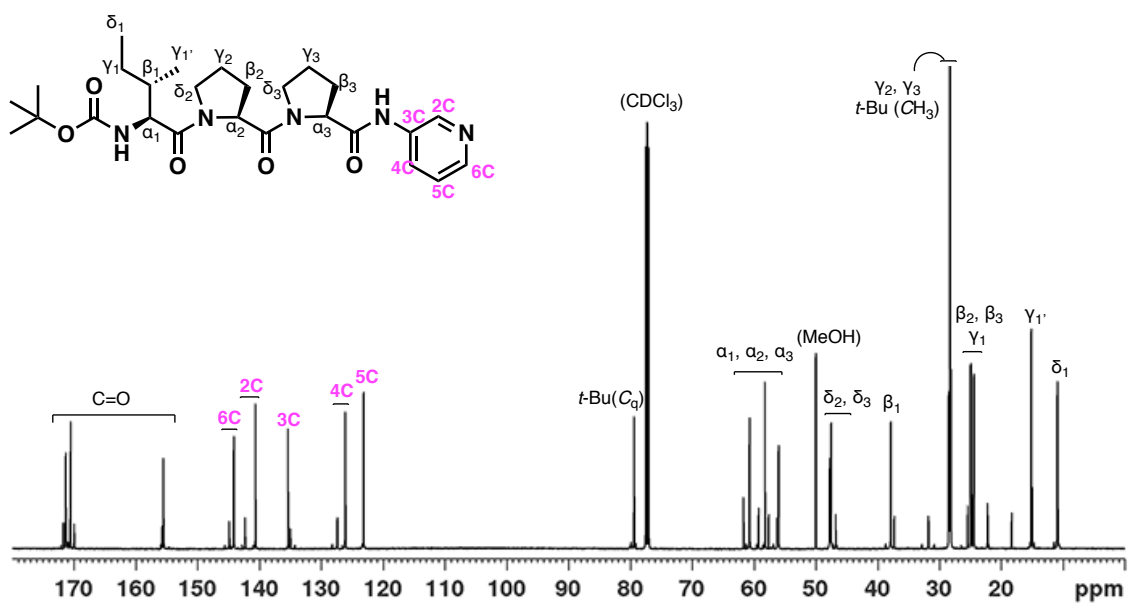

**Supplementary Figure 35** |  $^{13}\text{C}$  NMR spectrum (125 MHz,  $\text{CDCl}_3$ , 300 K) of **S4** (conformers exist).



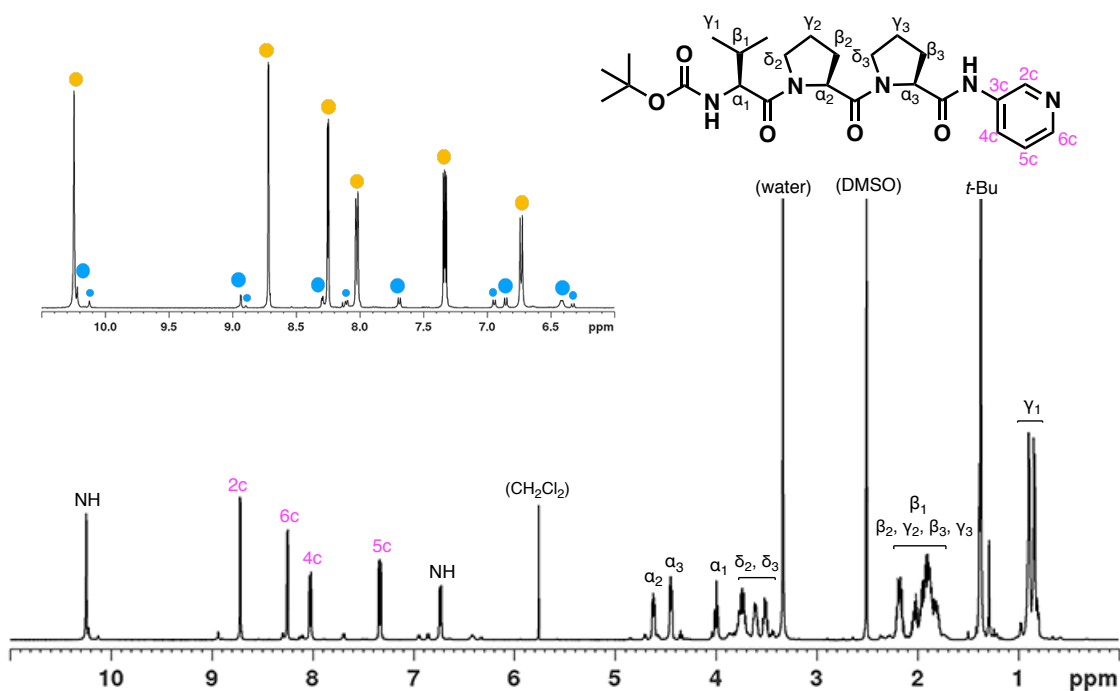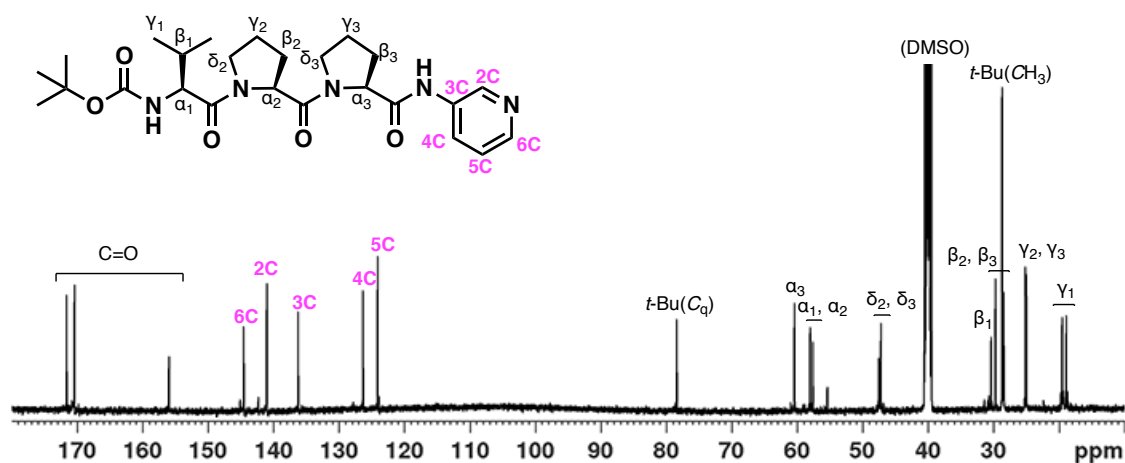

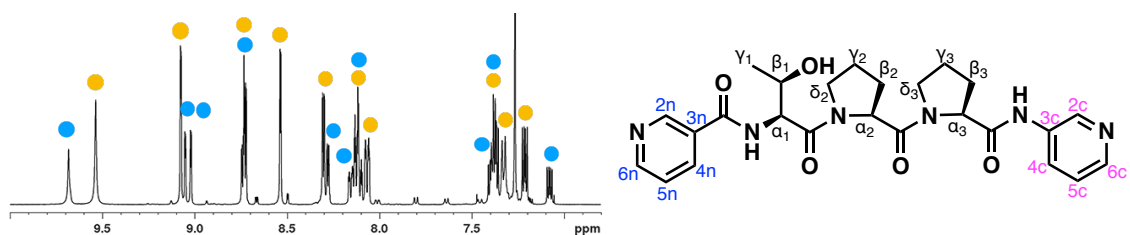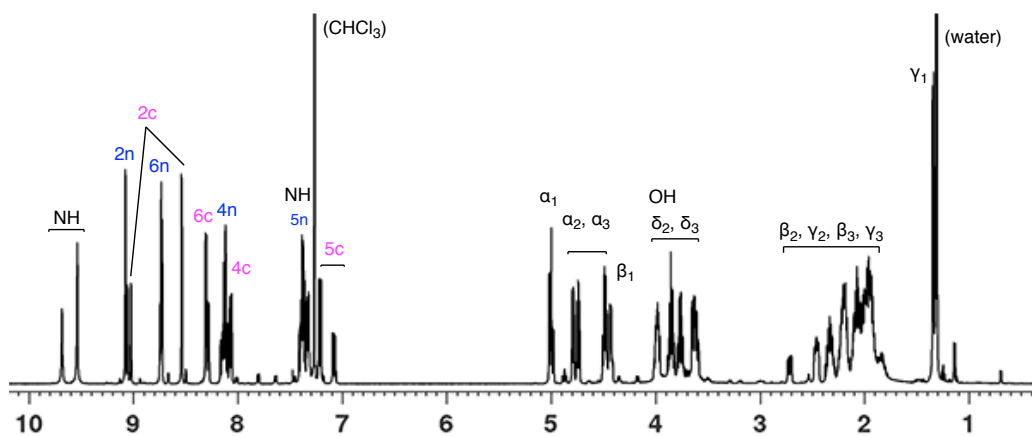

**Supplementary Figure 38** |  $^1\text{H}$  NMR spectrum (500 MHz,  $\text{CDCl}_3$ , 300 K) of **3** (conformers exist).

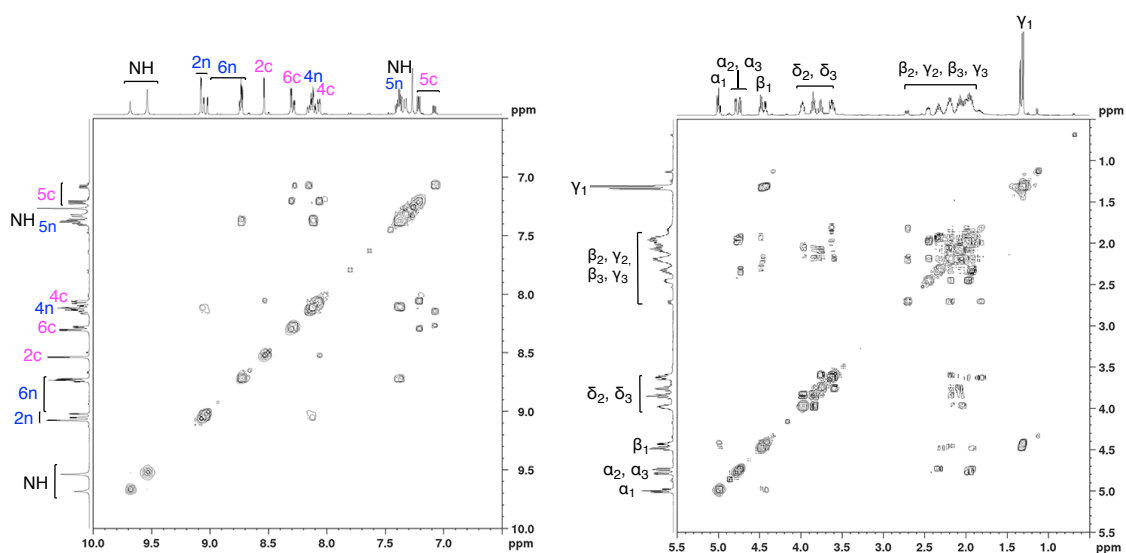

**Supplementary Figure 39** |  $^1\text{H}$ - $^1\text{H}$  COSY spectra of **2** ( $\text{CDCl}_3$ , 300 K).

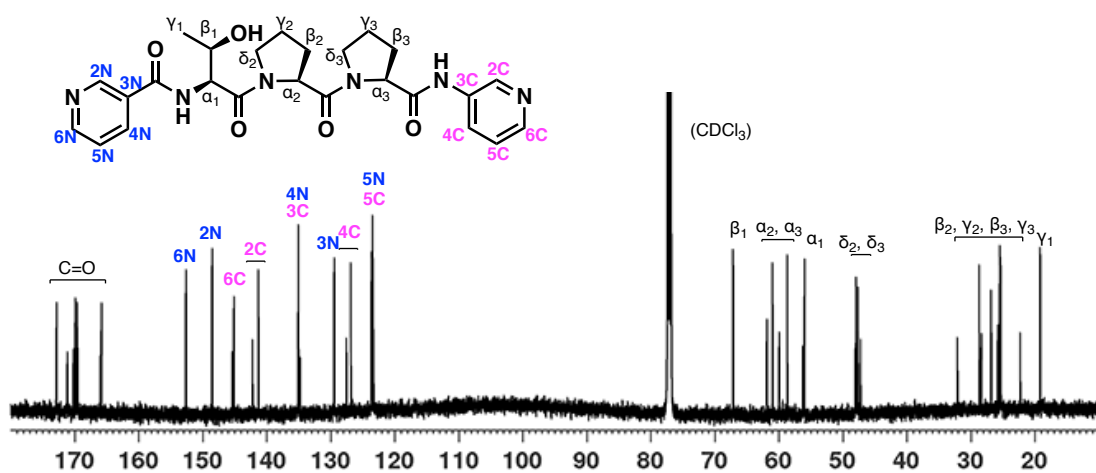

Supplementary Figure 40 |  $^{13}\text{C}$  NMR spectrum (125 MHz,  $\text{CDCl}_3$ , 300 K) of **3** (conformers exist).

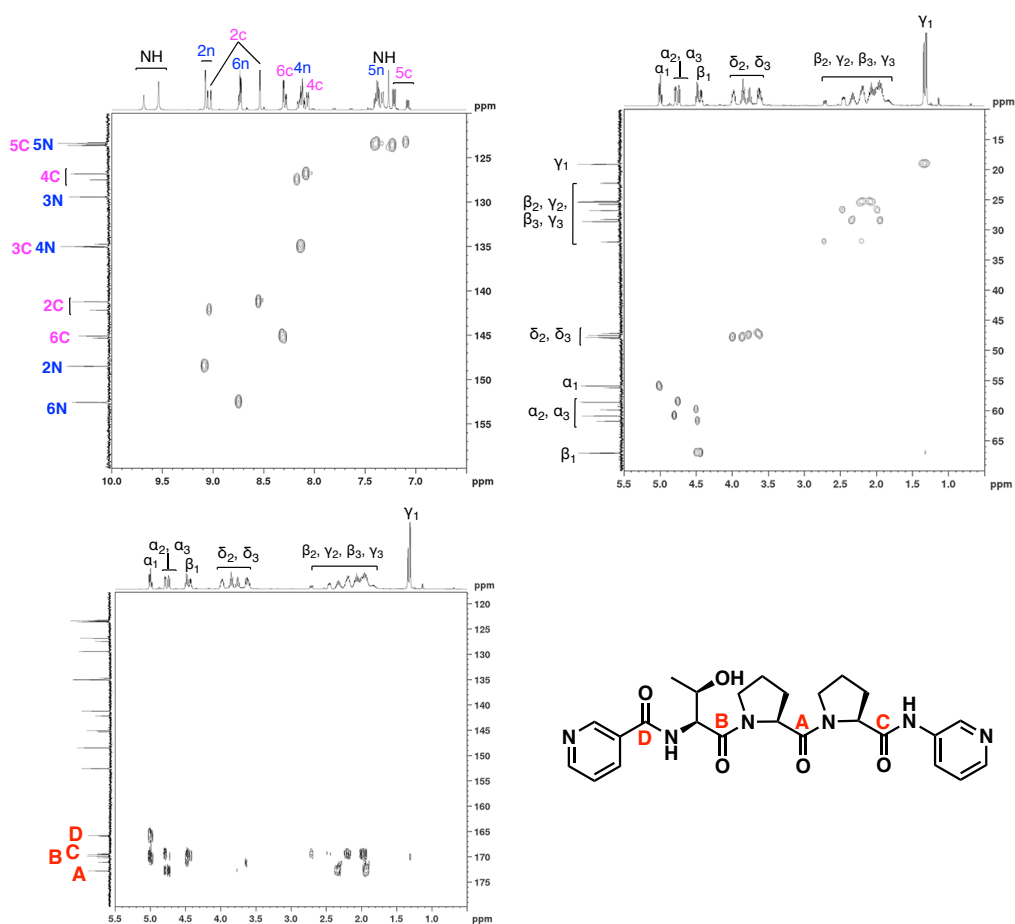

Supplementary Figure 41 |  $^1\text{H}$ - $^{13}\text{C}$  HSQC spectra (upper) and HMBC spectrum (bottom) of **3** ( $\text{CDCl}_3$ , 300 K).

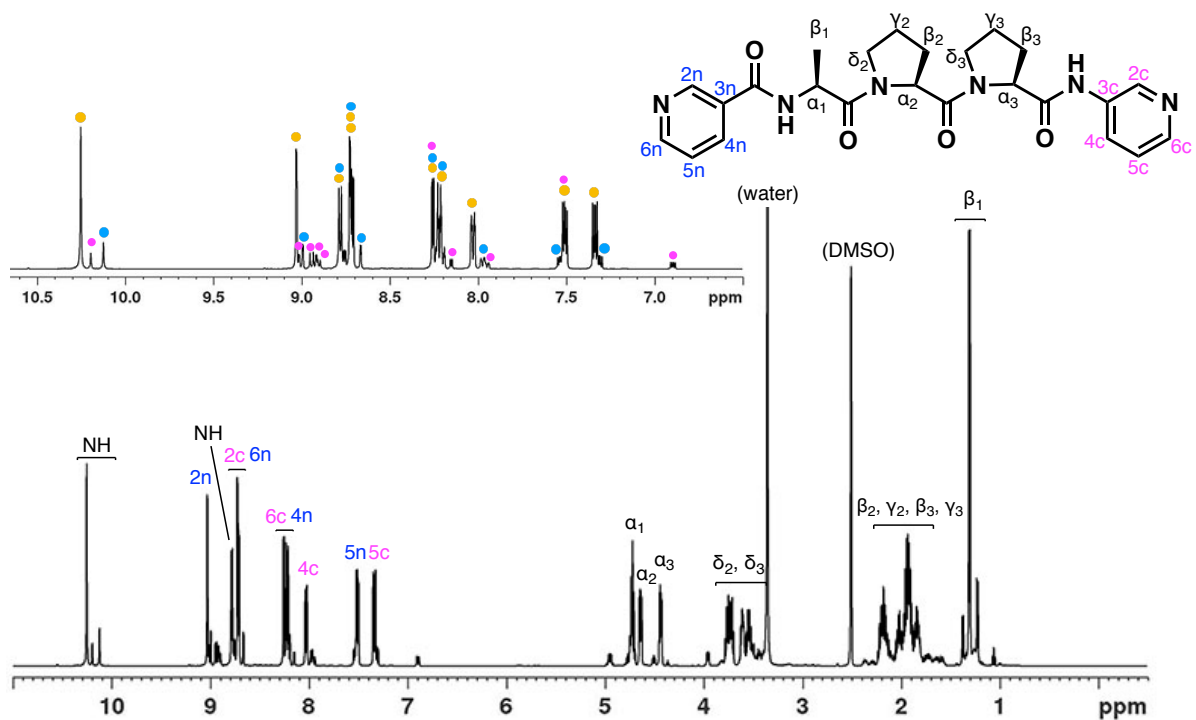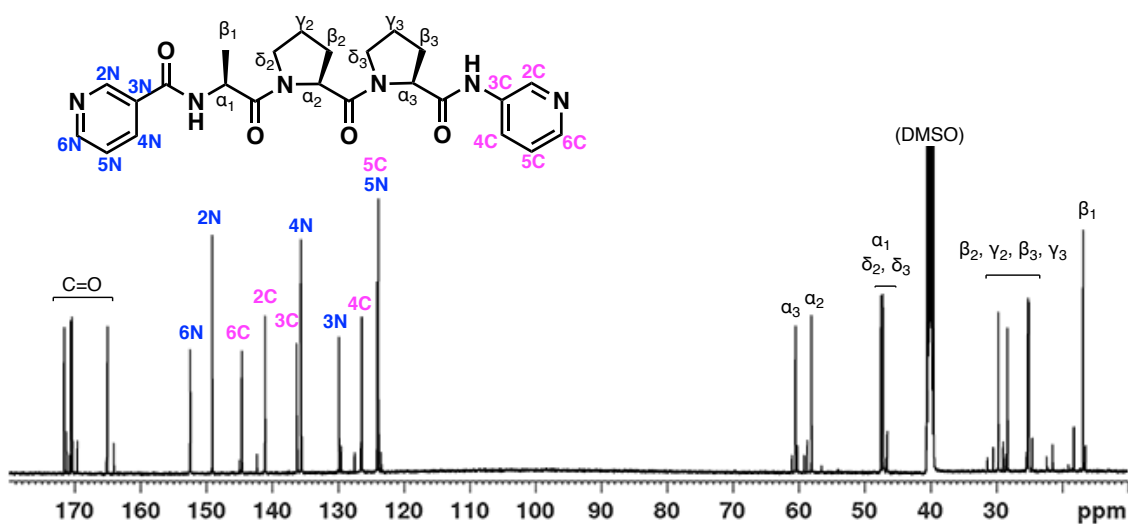

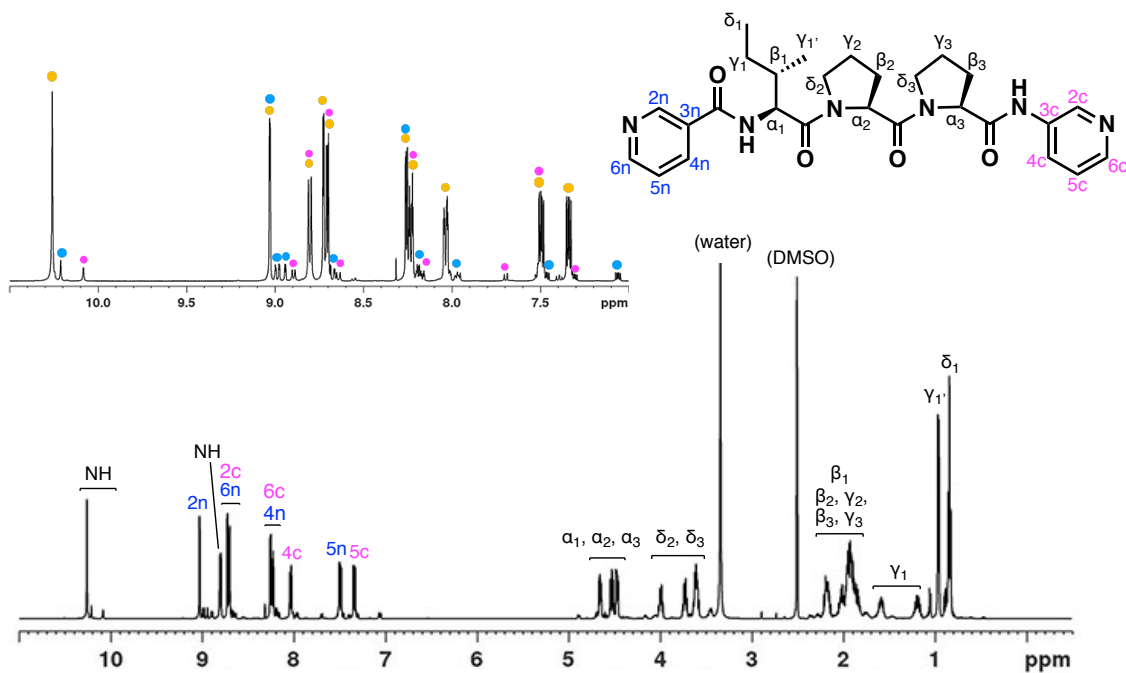

**Supplementary Figure 44** |  $^1\text{H}$  NMR spectrum (500 MHz,  $\text{DMSO-}d_6$ , 300 K) of **7** (conformers exist).

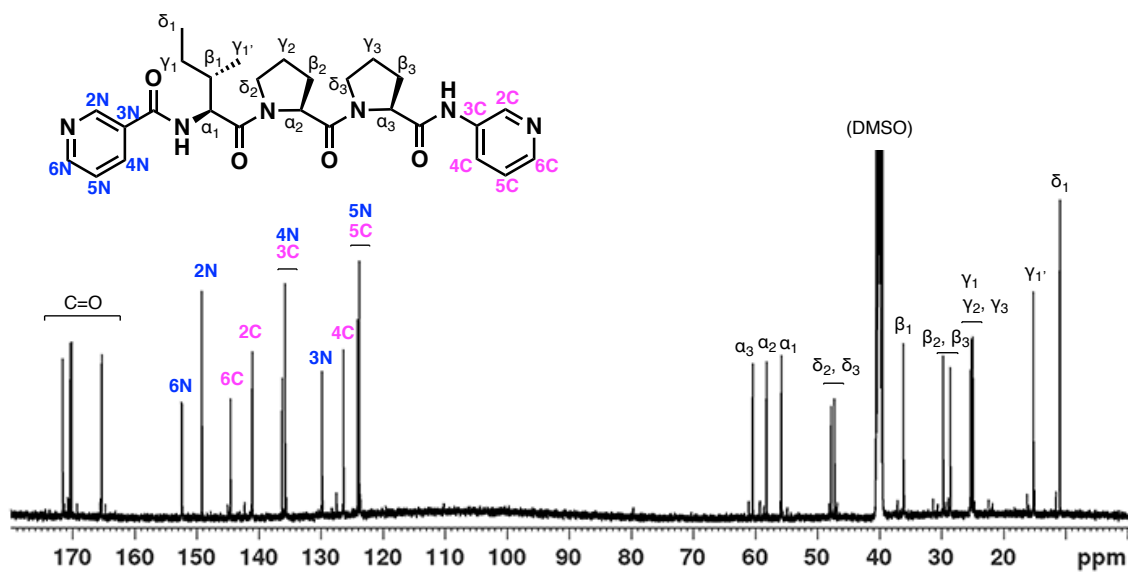

**Supplementary Figure 45** |  $^{13}\text{C}$  NMR spectrum (125 MHz,  $\text{DMSO-}d_6$ , 300 K) of **7** (conformers exist).

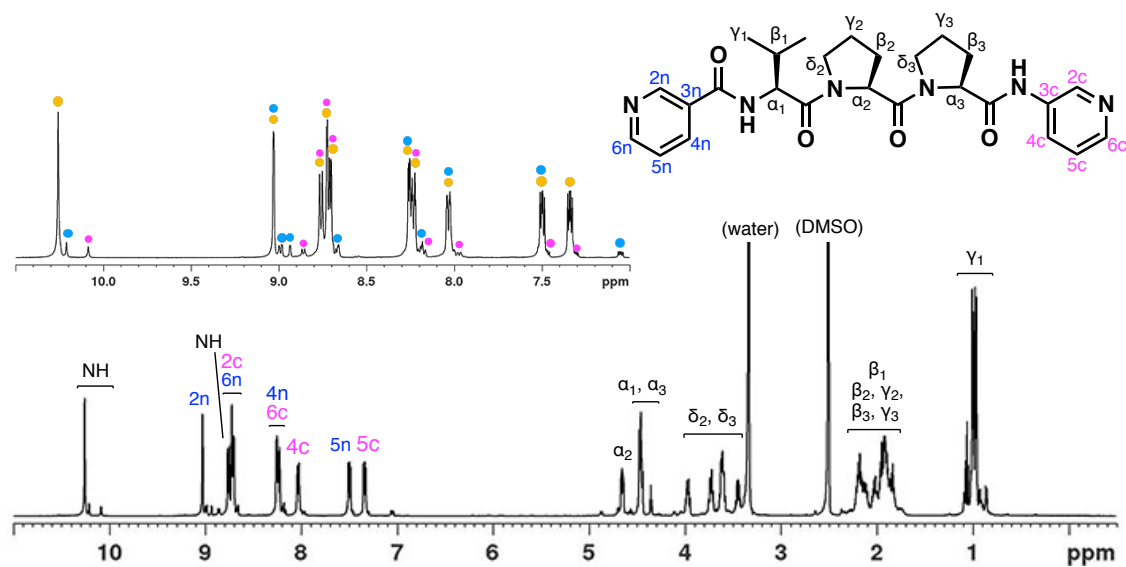

**Supplementary Figure 46** |  $^1\text{H}$  NMR spectrum (500 MHz,  $\text{DMSO-}d_6$ , 300 K) of **9** (conformers exist).

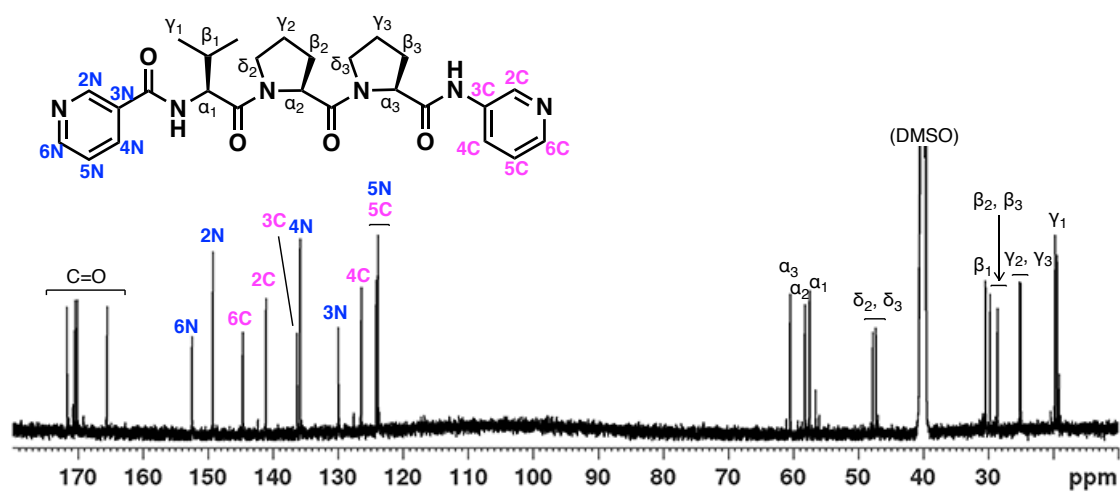

**Supplementary Figure 47** |  $^{13}\text{C}$  NMR spectrum (125 MHz,  $\text{DMSO-}d_6$ , 300 K) of **9** (conformers exist).

## Supplementary Discussion

### Topological analysis

The two topologies of  $[4]_{12}$ -catenanes **2** and **4** (shown in Fig. 1b diagram) were analysed as topologically-different, which was confirmed by calculation of their link invariants shown below. These link invariants were calculated by using KNOT program.<sup>3</sup>

Link invariant of the topology of compound **2** ( $L_1$ ):

crossing number

$$c(L_1) = 12$$

(total) linking number

$$lk(L_1) = -6$$

Conway polynomial

$$\nabla_{L_1} = -16z^3$$

Jones polynomial

$$\begin{aligned} V_{L_1} = & -t^{\frac{3}{2}} + 3t^{\frac{5}{2}} - 6t^{\frac{7}{2}} + 10t^{\frac{9}{2}} - 15t^{\frac{11}{2}} + 17t^{\frac{13}{2}} - 20t^{\frac{15}{2}} + 17t^{\frac{17}{2}} \\ & - 17t^{\frac{19}{2}} + 10t^{\frac{21}{2}} - 8t^{\frac{23}{2}} + 3t^{\frac{25}{2}} - t^{\frac{27}{2}} \end{aligned}$$

HOMFLY polynomial

$$\begin{aligned} P_{L_1}(v, z) = & z^{-3}(-v^{-9} + 3v^{-11} - 3v^{-13} + v^{-15}) \\ & + z^{-1}(-6v^{-9} + 12v^{-11} - 6v^{-13}) \\ & + z(-4v^{-7} - 7v^{-9} + 11v^{-11}) \\ & + z^3(-v^{-3} - 3v^{-5} - 6v^{-7} - 6v^{-9}) \end{aligned}$$

Q-polynomial

$$\begin{aligned} Q(L_1) = & 8x^{-3} - 12x^{-2} - 42x^{-1} + 47 + 140x - 92x^2 - 296x^3 + 68x^4 + 346x^5 \\ & + 44x^6 - 190x^7 - 78x^8 + 30x^9 + 24x^{10} + 4x^{11} \end{aligned}$$

Link invariant of the topology of compound **4** ( $L_2$ ):

crossing number

$$c(L_2) = 12$$

(total) linking number

$$lk(L_2) = 6$$

Conway polynomial

$$\nabla_{L_2} = 16z^5 + 16z^3$$

Jones polynomial

$$\begin{aligned} V_{L_2} = & -t^{-\frac{29}{2}} + 7t^{-\frac{27}{2}} - 20t^{-\frac{25}{2}} + 33t^{-\frac{23}{2}} - 50t^{-\frac{21}{2}} + 58t^{-\frac{19}{2}} - 63t^{-\frac{17}{2}} + 56t^{-\frac{15}{2}} \\ & - 46t^{-\frac{13}{2}} + 29t^{-\frac{11}{2}} - 15t^{-\frac{9}{2}} + 5t^{-\frac{7}{2}} - t^{-\frac{5}{2}} \end{aligned}$$

HOMFLY polynomial

$$\begin{aligned} P_{L_2}(v, z) = & z^{-3}(-v^{15} + 3v^{13} - 3v^{11} + v^9) \\ & + z^{-1}(6v^{13} - 12v^{11} + 6v^9) \\ & + z(4v^{13} - 23v^{11} + 19v^9) \\ & + z^3(-v^{13} - 11v^{11} + 22v^9 + 6v^7) \\ & + z^5(v^{11} + 9v^9 + 5v^7 + v^5) \end{aligned}$$

Q-polynomial

$$\begin{aligned} Q(L_2) = & 8x^{-3} - 12x^{-2} - 42x^{-1} + 47 + 76x - 60x^2 - 120x^3 + 60x^4 + 306x^5 \\ & + 28x^6 - 382x^7 - 178x^8 + 134x^9 + 114x^{10} + 22x^{11} \end{aligned}$$



The other topological descriptions can be available from the Knotilus website (<http://knotilus.math.uwo.ca>):

The archive code for the topology of [4]<sub>12</sub>-catenanes **2**: 12x-4-13

The archive code for the topology of [4]<sub>12</sub>-catenanes **4**: 12x-4-92

### Supplementary References

1. Sawada, T., Matsumoto, A., & Fujita, M. Coordination-driven folding and assembly of a short peptide into a protein-like two-nanometer-sized channel. *Angew. Chem. Ed.* **2014**, *53*, 7228–7232.
2. Sawada, T., Yamagami, M., Ohara, K., Yamaguchi, K., & Fujita, M. Peptide [4]catenane by folding and assembly. *Angew. Chem. Ed.* **2016**, *55*, 4519–4522.
3. Kodama, K., KNOT program, <http://www.math.kobe-u.ac.jp/HOME/kodama/knot.html> (2004).
